# Supplementary material for: Polychromatic holographic plasma diagnostics : a review
Source: MDPI journal article supplement (doi:10.3390/biology10111204), 1992-06-01
Supplement: s1 [file s1]

## Supplemental Materials

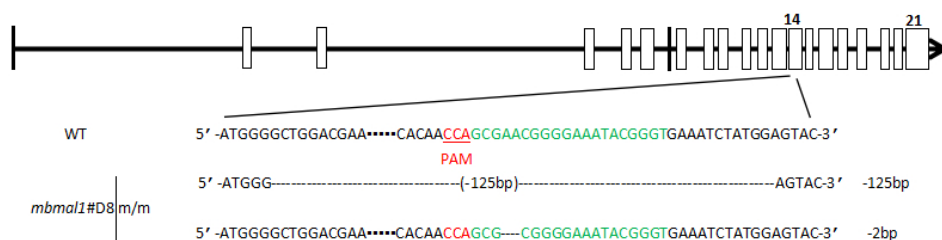

**Figure S1.** The sgRNA targeting the *Bmal1* gene and the sequences of both alleles in the *Bmal1* deletion cell strain.

|               |                       |                       |                       |                |            |                         |
|---------------|-----------------------|-----------------------|-----------------------|----------------|------------|-------------------------|
| <i>mbmal1</i> | MADQRMDISS            | TISDFMSPGP            | TDLLSGSLGT            | SGVDCNRKRK     | GSATDYQESM | DTDKDDPHGR              |
| D8-2          | MADQRMDISS            | TISDFMSPGP            | TDLLSGSLGT            | SGVDCNRKRK     | GSATDYQESM | DTDKDDPHGR              |
| D8-1          | MADQRMDISS            | TISDFMSPGP            | TDLLSGSLGT            | SGVDCNRKRK     | GSATDYQESM | DTDKDDPHGR              |
|               | *****                 | *****                 | *****                 | *****          | *****      | *****                   |
| <i>mbmal1</i> | LEYAEHQGRI            | KNAREAHSQI            | EKRRRDKMNS            | FIDELASLVP     | TCNAMSRKLD | KLTVLRMAVQ              |
| D8-2          | LEYAEHQGRI            | KNAREAHSQI            | EKRRRDKMNS            | FIDELASLVP     | TCNAMSRKLD | KLTVLRMAVQ              |
| D8-1          | LEYAEHQGRI            | KNAREAHSQI            | EKRRRDKMNS            | FIDELASLVP     | TCNAMSRKLD | KLTVLRMAVQ              |
|               | *****                 | *****                 | *****                 | *****          | *****      | *****                   |
| <i>mbmal1</i> | HMKTLRGATN            | PYTEANYKPT            | FLSDDELKHL            | ILRAADGFLF     | VVGCDRGKIL | FVSESVFkil              |
| D8-2          | HMKTLRGATN            | PYTEANYKPT            | FLSDDELKHL            | ILRAADGFLF     | VVGCDRGKIL | FVSESVFkil              |
| D8-1          | HMKTLRGATN            | PYTEANYKPT            | FLSDDELKHL            | ILRAADGFLF     | VVGCDRGKIL | FVSESVFkil              |
|               | *****                 | *****                 | *****                 | *****          | *****      | *****                   |
| <i>mbmal1</i> | NYSQNDLIQ             | SLFDYLHPKD            | IAKVKEQLSS            | SDTAPRERLI     | DAKTGLPVKT | DITPGPSRLC              |
| D8-2          | NYSQNDLIQ             | SLFDYLHPKD            | IAKVKEQLSS            | SDTAPRERLI     | DAKTGLPVKT | DITPGPSRLC              |
| D8-1          | NYSQNDLIQ             | SLFDYLHPKD            | IAKVKEQLSS            | SDTAPRERLI     | DAKTGLPVKT | DITPGPSRLC              |
|               | *****                 | *****                 | *****                 | *****          | *****      | *****                   |
| <i>mbmal1</i> | SGARRSFPCR            | MKCNRPsvkv            | EDKDFASTCS            | KKKADRKSFC     | TIHSTGYLKS | WPPTKMGLDE              |
| D8-2          | SGARRSFPCR            | MKCNRPsvkv            | EDKDFASTCS            | KKKADRKSFC     | TIHSTGYLKS | WPPTKM <del>G</del> VRF |
| D8-1          | SGARRSFPCR            | MKCNRPsvkv            | EDKDFASTCS            | KKKADRKSFC     | TIHSTGYLKS | WPPTKMGLDE              |
|               | *****                 | *****                 | *****                 | *****          | *****      | *****                   |
| <i>mbmal1</i> | DNEPDNEGCN            | LSCLVAIGRL            | HSHMVPQFAN            | GEIRVKSMEY     | VSRHAIDGKF | VFVDQRATAI              |
| D8-2          | <del>STRNRWEICF</del> | <del>CRSEGDsyfG</del> | <del>VSTTGTSRYI</del> | <del>ML*</del> |            |                         |
| D8-1          | DNEPDNEGCN            | LSCLVAIGRL            | HSHMVPQPAR            | GNTGEIYGVR     | FSTRNRWEIC | FCRSEGDsyf              |
|               |                       |                       |                       |                |            |                         |
| <i>mbmal1</i> | LAYLPQELLG            | TSCYEYFHQD            | DIGHLAECHR            | QVLQTREKIT     | TNCYKFKIKD | GSFITLRSRW              |
| D8-2          |                       |                       |                       |                |            |                         |
| D8-1          | <del>GVSTTGTSRY</del> | <del>IML*</del>       |                       |                |            |                         |
|               |                       |                       |                       |                |            |                         |
| <i>mbmal1</i> | FSFMNPWTKE            | VEYIVSTNTV            | VLANVLEGGD            | PTFPQLTAPP     | HSMDSMLPSG | EGGPKRTHPT              |
| D8-2          |                       |                       |                       |                |            |                         |
| D8-1          |                       |                       |                       |                |            |                         |
|               |                       |                       |                       |                |            |                         |
| <i>mbmal1</i> | VPGIPGGTRA            | GAGKIGRMIA            | EEIMEIHRIR            | GSSPSSCGSS     | PLNITSTPPP | DASSPGGKKI              |
| D8-2          |                       |                       |                       |                |            |                         |
| D8-1          |                       |                       |                       |                |            |                         |
|               |                       |                       |                       |                |            |                         |
| <i>mbmal1</i> | LNGGTPDIPS            | TGLLPQAQAE            | TPGYPSYDSS            | SILGENPHIG     | IDMIDNDQGS | SSPSNDEAAM              |
| D8-2          |                       |                       |                       |                |            |                         |
| D8-1          |                       |                       |                       |                |            |                         |
|               |                       |                       |                       |                |            |                         |
| <i>mbmal1</i> | AVIMSLLEAD            | AGLGGPVDFS            | DLPWPL*               |                |            |                         |
| D8-2          |                       |                       |                       |                |            |                         |
| D8-1          |                       |                       |                       |                |            |                         |

**Figure S2.** Predicted translation products of both alleles in the *Bmal1* deletion cell strain.

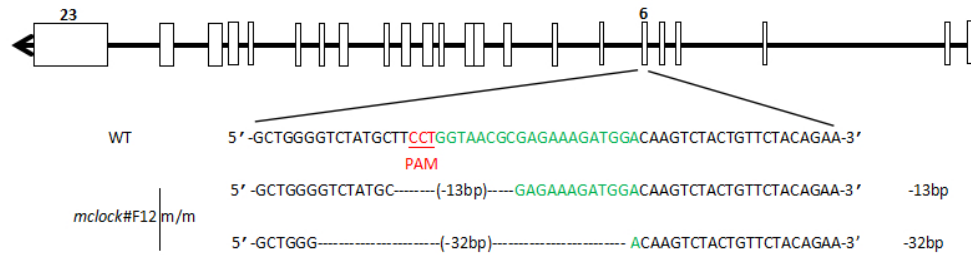

**Figure S3.** The sgRNA targeting the *Clock* gene and the sequences of both alleles in the *Clock* deletion cell strain.

|               |            |            |            |            |             |            |
|---------------|------------|------------|------------|------------|-------------|------------|
| <i>mClock</i> | MVFTVSCSKM | SSIVDRDDSS | IFDGLVEEDD | KDKAKRVSRN | KSEKKRRDQF  | NVLIKELGSM |
| F12-1         | MVFTVSCSKM | SSIVDRDDSS | IFDGLVEEDD | KDKAKRVSRN | KSEKKRRDQF  | NVLIKELGSM |
| F12-2         | MVFTVSCSKM | SSIVDRDDSS | IFDGLVEEDD | KDKAKRVSRN | KSEKKRRDQF  | NVLIKELGQV |
| <i>mClock</i> | LPGNARKMDK | STVLQKSIDF | LRKHKETTAQ | SDASEIRQDW | KPTFLSNEEF  | TQLMLEALDG |
| F12-1         | REKWTSLLFY | RRALIFCANI | KRPLHSQMLV | RFDRTCNPHS | LVMKSLHS*-  | -----      |
| F12-2         | YCSTEEH*-  | -----      | -----      | -----      | -----       | -----      |
| <i>mClock</i> | FFLAIMTDGS | IIYVESVTS  | LLEHLPSDLV | DQSIFNFIPE | GEHSEVYKIL  | STHLESDSL  |
| F12-1         | -----      | -----      | -----      | -----      | -----       | -----      |
| F12-2         | -----      | -----      | -----      | -----      | -----       | -----      |
| <i>mClock</i> | TPEYLKSKNQ | LEFOCHMLRG | TIDPKEPSTY | EYVRFIGNFK | SLTSVSTSTH  | NGFEGTIQRT |
| F12-1         | -----      | -----      | -----      | -----      | -----       | -----      |
| F12-2         | -----      | -----      | -----      | -----      | -----       | -----      |
| <i>mClock</i> | HRPSYEDRVC | FVATVRLATP | QFIKEMCTVE | EPNEEFTSRH | SLEWKFLFLD  | HRAPPIIGYL |
| F12-1         | -----      | -----      | -----      | -----      | -----       | -----      |
| F12-2         | -----      | -----      | -----      | -----      | -----       | -----      |
| <i>mClock</i> | PFEVLGTSQY | DYYHVDLEN  | LAKCHEHLMQ | YKRGKSCYYR | FLTRGQQWIW  | LQTHYIITYH |
| F12-1         | -----      | -----      | -----      | -----      | -----       | -----      |
| F12-2         | -----      | -----      | -----      | -----      | -----       | -----      |
| <i>mClock</i> | QWNSRPEFIV | CTHTVVSYAE | VRAERRRELG | IEESLPETAA | DKSQDSGSDN  | RINTVSLKEA |
| F12-1         | -----      | -----      | -----      | -----      | -----       | -----      |
| F12-2         | -----      | -----      | -----      | -----      | -----       | -----      |
| <i>mClock</i> | LERFDHSPTP | SASSRSSRKS | SHTAVSDPSS | TPTKIPTDTS | TPPRQHLPAAH | EKMTQRRSSF |
| F12-1         | -----      | -----      | -----      | -----      | -----       | -----      |
| F12-2         | -----      | -----      | -----      | -----      | -----       | -----      |
| <i>mClock</i> | SSQSINSQSV | GPSLTQPAMS | QAANLPPIQG | MSQFQFSAQL | GAMQHLKDQL  | EQRTRMIEAN |
| F12-1         | -----      | -----      | -----      | -----      | -----       | -----      |
| F12-2         | -----      | -----      | -----      | -----      | -----       | -----      |
| <i>mClock</i> | IHRQQEELRK | IQEQLQMVHG | QGLQMFLQQS | NPGLNFGSVQ | LSSGNSNIQQ  | LTPVNMQGGV |
| F12-1         | -----      | -----      | -----      | -----      | -----       | -----      |
| F12-2         | -----      | -----      | -----      | -----      | -----       | -----      |
| <i>mClock</i> | VPANQVQSGH | ISTGQHMIQQ | QTLQSTSTQQ | SQSQVMSGHS | QQTSLPSQTP  | STLTAPLYNT |
| F12-1         | -----      | -----      | -----      | -----      | -----       | -----      |
| F12-2         | -----      | -----      | -----      | -----      | -----       | -----      |
| <i>mClock</i> | MVISQPAAGS | MVQIPSSMPQ | NSTQSATVTT | FTQDRQIRFS | QQQQLVTKLV  | TAPVACGAYM |
| F12-1         | -----      | -----      | -----      | -----      | -----       | -----      |
| F12-2         | -----      | -----      | -----      | -----      | -----       | -----      |
| <i>mClock</i> | VPSTMLMGQV | VTAYPTFATQ | QQQAQTLSTV | QQQQQQQQQP | PQQQQQQQQS  | SQEQQLPSVQ |
| F12-1         | -----      | -----      | -----      | -----      | -----       | -----      |
| F12-2         | -----      | -----      | -----      | -----      | -----       | -----      |
| <i>mClock</i> | QPAQAQLGQP | PQFLQTSRL  | LHGMPSTQLI | LSAAFLQQS  | TFPPSHHQH   | QPQQQQQLPR |
| F12-1         | -----      | -----      | -----      | -----      | -----       | -----      |
| F12-2         | -----      | -----      | -----      | -----      | -----       | -----      |
| <i>mClock</i> | HRTDSLTDPS | KVQFP*     | -----      | -----      | -----       | -----      |
| F12-1         | -----      | -----      | -----      | -----      | -----       | -----      |
| F12-2         | -----      | -----      | -----      | -----      | -----       | -----      |

**Figure S4.** Predicted translation products of both alleles in the *Clock* deletion cell strain.

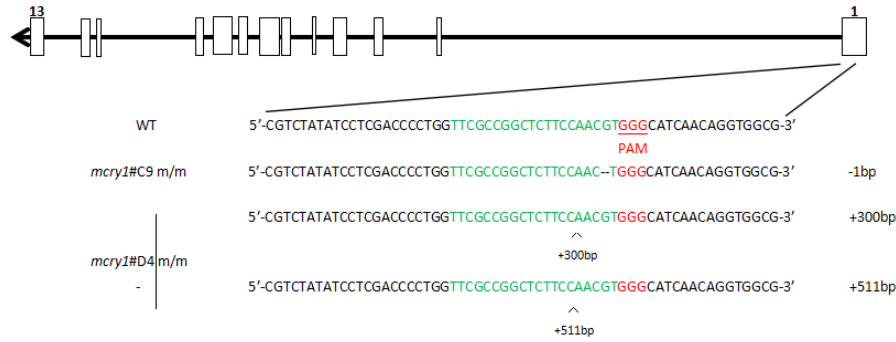

**Figure S5.** The sgRNA targeting the *CryI* gene and the sequences of both alleles in the *CryI* deletion cell strains.

|             |                   |            |            |            |                    |                   |
|-------------|-------------------|------------|------------|------------|--------------------|-------------------|
| <i>mcr1</i> | MGVNAVHWFR        | KGLRLHDNPA | LKECIQGADT | IRCVYILDPW | FAGSSNVGIN         | RWRFLQCLE         |
| C9-1/2      | MGVNAVHWFR        | KGLRLHDNPA | LKECIQGADT | IRCVYILDPW | FAGSSN <b>WAST</b> | <b>GGDFCFSVLR</b> |
|             | *****             | *****      | *****      | *****      | *****              | *****             |
| <i>mcr1</i> | DLDANLRKLN        | SRLFVIRGQP | ADVFPRLFKE | WNITKLSIEY | DSEPFQKERD         | AAIKKLATEA        |
| C9-1/2      | <b>ILMPIYEN*-</b> |            |            |            |                    |                   |
| <i>mcr1</i> | GVEVIVRISH        | TLYDLDKIIE | LNGGQPPLTY | KRFQTLVSKM | EPLEMPADTI         | TSDVIGKCMT        |
| C9-1/2      |                   |            |            |            |                    |                   |
| <i>mcr1</i> | PLSDDHDEKY        | GVPSLEELGF | DTDGLSSAVW | PGGETEALTR | LERHLERKAW         | VANFERPRMN        |
| C9-1/2      |                   |            |            |            |                    |                   |
| <i>mcr1</i> | ANSLASPTG         | LSPYLRFGCL | SCRIFYFKLT | DLYKKVKKNS | SPPLSLYGQL         | LWREFFYTAA        |
| C9-1/2      |                   |            |            |            |                    |                   |
| <i>mcr1</i> | TNNPRFDKME        | GNPICVQIPW | DKNPEALAKW | AEGRTGFPWI | DAIMTQLRQE         | GWIIHLARHA        |
| C9-1/2      |                   |            |            |            |                    |                   |
| <i>mcr1</i> | VACFLTRGDL        | WISWEEGMKV | FEELLLDADW | SINAGSWMWL | SCSSFFQQFF         | HCYCPVGFR         |
| C9-1/2      |                   |            |            |            |                    |                   |
| <i>mcr1</i> | RTDPNGDYIR        | RYLPVLRGFP | AKYIYDPWNA | PEGIQKVAKC | LIGVNYPKPM         | VNHAEASRLN        |
| C9-1/2      |                   |            |            |            |                    |                   |
| <i>mcr1</i> | IERMKQIYQQ        | LSRYRGLGLL | ASVPSNSNGN | GGLMGYAPGE | NVPSCSSSGN         | GGLMGYAPGE        |
| C9-1/2      |                   |            |            |            |                    |                   |
| <i>mcr1</i> | NVPSCSGGNC        | SQSGGILHYA | HGDSQQTHSL | KQCRSSACTG | LSSGKRPSQE         | EDAQSVGPKV        |
| C9-1/2      |                   |            |            |            |                    |                   |
| <i>mcr1</i> | QRQSSN*           |            |            |            |                    |                   |
| C9-1/2      |                   |            |            |            |                    |                   |

**Figure S6.** Predicted translation products of both alleles in the *CryI* deletion cell strain (*CryI*-C9).

|              |                   |                    |                   |                   |                    |                   |
|--------------|-------------------|--------------------|-------------------|-------------------|--------------------|-------------------|
| <i>mcry1</i> | MGVNAVHWFR        | KGLRLHDNPA         | LKECIQGADT        | IRCVYILDPW        | FAGSSNVGIN         | RWRFLQCLE         |
| D4-1         | MGVNAVHWFR        | KGLRLHDNPA         | LKECIQGADT        | IRCVYILDPW        | FAGSSKIRFV         | FIEHRQTRSG        |
| D4-2         | MGVNAVHWFR        | KGLRLHDNPA         | LKECIQGADT        | IRCVYILDPW        | FAGSSN <b>SRVT</b> | TGNSGCLLCW        |
|              | *****             | *****              | *****             | *****             | *****              | *****             |
| <i>mcry1</i> | DLDANLRKLN        | SRLFVIRGQP         | ADVFPRLFKE        | WNITKLSIEY        | DSEFPGKERD         | AAIKKLATEA        |
| D4-1         | <b>S*</b> _____   | _____              | _____             | _____             | _____              | _____             |
| D4-2         | <b>PRQVQSSIRV</b> | <b>AKESWGLLSS</b>  | <b>DCRANRPHLG</b> | <b>LCPEASVPLQ</b> | <b>GRHPRGRLWQ</b>  | <b>CAHPQPLSPL</b> |
| <i>mcry1</i> | GVEVIVRISH        | TYDLDKIIE          | LNGQPPLTY         | KRFQTLVSKM        | EPLEMPADTI         | TSDVIGKCMT        |
| D4-1         | _____             | _____              | _____             | _____             | _____              | _____             |
| D4-2         | <b>QGRLAPRSEG</b> | <b>KARAE LRHQS</b> | <b>GTTHGSHTPA</b> | <b>ACSFPGANAR</b> | <b>SWAGLGEARP</b>  | <b>AQSSLSAGAL</b> |
| <i>mcry1</i> | PLSDDHDEKY        | GVPSLEELGF         | DTDGLSSAVW        | PGGETEALTR        | LERHLERKAW         | VANFERPRMN        |
| D4-1         | _____             | _____              | _____             | _____             | _____              | _____             |
| D4-2         | <b>CYRAWAQWS</b>  | <b>SAGVEAHSV L</b> | <b>PSTGLQAPAG</b> | <b>SQPLLSRGHQ</b> | <b>QVAIFASVS*</b>  | _____             |
| <i>mcry1</i> | ANSLLASPTG        | LSPYLRFGCL         | SCRLFYFKLT        | DLYKKVKKNS        | SPPLSLYGQL         | LWREFFYTAA        |
| D4-1         | _____             | _____              | _____             | _____             | _____              | _____             |
| D4-2         | _____             | _____              | _____             | _____             | _____              | _____             |
| <i>mcry1</i> | TNNPRFDKME        | GNPICVQIPW         | DKNPEALAKW        | AEGRTGFPWI        | DAIMTQLRQE         | GWIIHLARHA        |
| D4-1         | _____             | _____              | _____             | _____             | _____              | _____             |
| D4-2         | _____             | _____              | _____             | _____             | _____              | _____             |
| <i>mcry1</i> | VACFLTRGDL        | WISWEEGMKV         | FEELLLDADW        | SINAGSWMWL        | SCSSFFQQFF         | HCYCPVGFR         |
| D4-1         | _____             | _____              | _____             | _____             | _____              | _____             |
| D4-2         | _____             | _____              | _____             | _____             | _____              | _____             |
| <i>mcry1</i> | RTDPNGDYIR        | RYLPVLRGFP         | AKYIYDPWNA        | PEGIQKVAKC        | LIGVNYPKPM         | VNHAEASRLN        |
| D4-1         | _____             | _____              | _____             | _____             | _____              | _____             |
| D4-2         | _____             | _____              | _____             | _____             | _____              | _____             |
| <i>mcry1</i> | IERMKQIYQQ        | LSRYRGLGLL         | ASVPSNSNGN        | GGLMGYAPGE        | NVPSCSSSGN         | GGLMGYAPGE        |
| D4-1         | _____             | _____              | _____             | _____             | _____              | _____             |
| D4-2         | _____             | _____              | _____             | _____             | _____              | _____             |
| <i>mcry1</i> | NVPSCSGGNC        | SQGSGILHYA         | HGDSQQTHSL        | KQGRSSAGTG        | LSSGKRPSQE         | EDAQSVGPKV        |
| D4-1         | _____             | _____              | _____             | _____             | _____              | _____             |
| D4-2         | _____             | _____              | _____             | _____             | _____              | _____             |
| <i>mcry1</i> | QRQSSN*           |                    |                   |                   |                    |                   |
| D4-1         | _____             |                    |                   |                   |                    |                   |
| D4-2         | _____             |                    |                   |                   |                    |                   |

**Figure S7.** Predicted translation products of both alleles in the *CryI* deletion cell strain (*CryI*-D4).



|              |            |            |            |             |            |            |
|--------------|------------|------------|------------|-------------|------------|------------|
| <i>mcry2</i> | MAAAAVVAAT | VPAQSMGADG | ASSVHWFRKG | LRLHNPALL   | AAVRGARCVR | CVYILDPWFA |
| H3-1         | MAAAAVVAAT | VRLHRV*    | —————      | —————       | —————      | —————      |
| H3-2         | MAAAAVVAAT | VPAPARPRCT | GSAKDYGSTT | TPRC*       | —————      | —————      |
|              | *****      | *          |            |             |            |            |
| <i>mcry2</i> | ASSVGINRW  | RFLQSLEDL  | DTSLRKLNSR | LFVVRGQPAD  | VFPRLFKEWG | VTRLTFEYDS |
| H3-1         | —————      | —————      | —————      | —————       | —————      | —————      |
| H3-2         | —————      | —————      | —————      | —————       | —————      | —————      |
| <i>mcry2</i> | EPFGKERDAA | IMKMAKEAGV | EVVTENSHTL | YDLDRRIELN  | GQKPPLTYKR | FQALISRMEL |
| H3-1         | —————      | —————      | —————      | —————       | —————      | —————      |
| H3-2         | —————      | —————      | —————      | —————       | —————      | —————      |
| <i>mcry2</i> | PKKPAVAVSS | QQMESCRAEI | QENHDDTYGV | PSLEELGFPT  | EGLCPAVWQG | GETEALARLD |
| H3-1         | —————      | —————      | —————      | —————       | —————      | —————      |
| H3-2         | —————      | —————      | —————      | —————       | —————      | —————      |
| <i>mcry2</i> | KHLERKAWVA | NYERPRMNAN | SLLASPTGLS | PYLRFGLCLSC | RLFYRLWDL  | YKKVKRNSTP |
| H3-1         | —————      | —————      | —————      | —————       | —————      | —————      |
| H3-2         | —————      | —————      | —————      | —————       | —————      | —————      |
| <i>mcry2</i> | PLSLFGQLLW | REFFYTAATN | NPRFDRMEGN | PICIQIPWDR  | NPEALAKWAE | GKTGFPWIDA |
| H3-1         | —————      | —————      | —————      | —————       | —————      | —————      |
| H3-2         | —————      | —————      | —————      | —————       | —————      | —————      |
| <i>mcry2</i> | IMTQLRQEGW | IHHLARHAVA | CFLTRGDLWV | SWESGVRVFD  | ELLLDADFSV | NAGSWMWLSC |
| H3-1         | —————      | —————      | —————      | —————       | —————      | —————      |
| H3-2         | —————      | —————      | —————      | —————       | —————      | —————      |
| <i>mcry2</i> | SAFQQFFHC  | YCPVGFGRR  | DPSGDYIRRY | LPKLGFPSPR  | YIYEPWNAPE | SVQKAAKCII |
| H3-1         | —————      | —————      | —————      | —————       | —————      | —————      |
| H3-2         | —————      | —————      | —————      | —————       | —————      | —————      |
| <i>mcry2</i> | GVDYPRPIVN | HAETSRLNIE | RMKQIYQQLS | RYRGLCLLAS  | VPSCVEDLSH | PVAEPGSSQA |
| H3-1         | —————      | —————      | —————      | —————       | —————      | —————      |
| H3-2         | —————      | —————      | —————      | —————       | —————      | —————      |
| <i>mcry2</i> | GSISNTGPRA | LSSGPASPKR | KLEAAEEPPG | EELTKRARVT  | EMPTQEPASK | DS*        |
| H3-1         | —————      | —————      | —————      | —————       | —————      | —————      |
| H3-2         | —————      | —————      | —————      | —————       | —————      | —————      |

**Figure S10.** Predicted translation products of both alleles in the *Cry2* deletion cell strain (*Cry2*-H3).

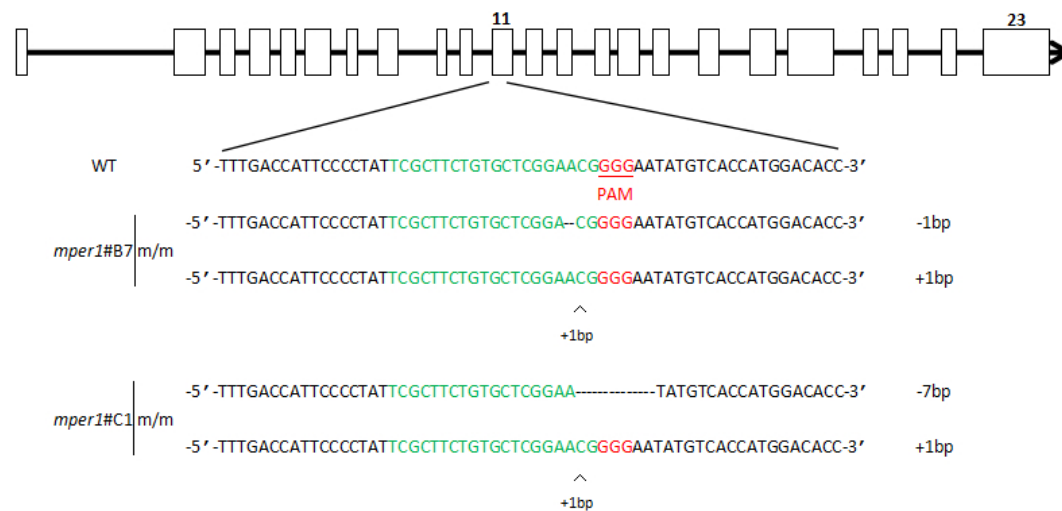

**Figure S11.** The sgRNA targeting the *Per1* gene and the sequences of both alleles in the *Per1* deletion cell strain.

|              |            |            |            |            |            |             |
|--------------|------------|------------|------------|------------|------------|-------------|
| <i>mparl</i> | MSGFLEGADG | GGDFRPCEPF | CPGGVPSFGA | PQHRPCPGPS | LADDTDANSN | GSSGNESNCP  |
| C1-1         | MSGFLEGADG | GGDFRPCEPF | CPGGVPSFGA | PQHRPCPGPS | LADDTDANSN | GSSGNESNCP  |
| C1-2         | MSGFLEGADG | GGDFRPCEPF | CPGGVPSFGA | PQHRPCPGPS | LADDTDANSN | GSSGNESNCP  |
| <i>mparl</i> | ESRGASQRSS | HSSSSGNCKD | SALLETTES  | KSTNSQSPSP | PSSSIAYSL  | SASSEQDNPS  |
| C1-1         | ESRGASQRSS | HSSSSGNCKD | SALLETTES  | KSTNSQSPSP | PSSSIAYSL  | SASSEQDNPS  |
| C1-2         | ESRGASQRSS | HSSSSGNCKD | SALLETTES  | KSTNSQSPSP | PSSSIAYSL  | SASSEQDNPS  |
| <i>mparl</i> | TSGCSSEQSA | RARTQKELMT | ALRELKLRLP | PERRGKGRSG | TLATLQYALA | CVKQVQANQE  |
| C1-1         | TSGCSSEQSA | RARTQKELMT | ALRELKLRLP | PERRGKGRSG | TLATLQYALA | CVKQVQANQE  |
| C1-2         | TSGCSSEQSA | RARTQKELMT | ALRELKLRLP | PERRGKGRSG | TLATLQYALA | CVKQVQANQE  |
| <i>mparl</i> | YYQQWSLEEG | EPCAMDMSY  | TLEELEHITS | EYTLRNQDTF | SVAVSFLTGR | IVYISEQAGV  |
| C1-1         | YYQQWSLEEG | EPCAMDMSY  | TLEELEHITS | EYTLRNQDTF | SVAVSFLTGR | IVYISEQAGV  |
| C1-2         | YYQQWSLEEG | EPCAMDMSY  | TLEELEHITS | EYTLRNQDTF | SVAVSFLTGR | IVYISEQAGV  |
| <i>mparl</i> | LLRCKRDVFR | GARFSELLAP | QDVGVFYGST | TPSRLPTWGT | GTSAGSGLKD | FTQEKSVFCR  |
| C1-1         | LLRCKRDVFR | GARFSELLAP | QDVGVFYGST | TPSRLPTWGT | GTSAGSGLKD | FTQEKSVFCR  |
| C1-2         | LLRCKRDVFR | GARFSELLAP | QDVGVFYGST | TPSRLPTWGT | GTSAGSGLKD | FTQEKSVFCR  |
| <i>mparl</i> | IRGGPDRDPG | PRYQPFRLTP | YVTKIRVSDG | APAQPCLLI  | AERIHSGYEA | PRIPDPKRIF  |
| C1-1         | IRGGPDRDPG | PRYQPFRLTP | YVTKIRVSDG | APAQPCLLI  | AERIHSGYEA | PRIPDPKRIF  |
| C1-2         | IRGGPDRDPG | PRYQPFRLTP | YVTKIRVSDG | APAQPCLLI  | AERIHSGYEA | PRIPDPKRIF  |
| <i>mparl</i> | TTRHTPSCLF | QDVDERAAPL | LGYPQLDLG  | APVLLFLHPE | DRPLMLAIHK | KILQLAGQFF  |
| C1-1         | TTRHTPSCLF | QDVDERAAPL | LGYPQLDLG  | APVLLFLHPE | DRPLMLAIHK | KILQLAGQFF  |
| C1-2         | TTRHTPSCLF | QDVDERAAPL | LGYPQLDLG  | APVLLFLHPE | DRPLMLAIHK | KILQLAGQFF  |
| <i>mparl</i> | DHSPIRFCAR | NCEYVTMDTS | WAGFVHPWSR | KVAFVLGRHK | VRTAPLNEDV | FTFPAPSPAP  |
| C1-1         | DHSPIRFCAR | KRGICHGHQ  | LGRFCAPLEP | QGGFRVGS*  | -----      | -----       |
| C1-2         | DHSPIRFCAR | NMSPWTFAPG | VLCTPGAARW | LSCWVAIKCA | RHP*       | -----       |
| <i>mparl</i> | SLDSIDIQLS | EQIHRLLQ   | VHSSSPTGLC | GVGPLMSFGP | LHSPGSSSDS | NGDAEGPGP   |
| C1-1         | -----      | -----      | -----      | -----      | -----      | -----       |
| C1-2         | -----      | -----      | -----      | -----      | -----      | -----       |
| <i>mparl</i> | PAPVTFQQIC | KDVHLVKHQG | QQLFIESRAK | PPRPRLLAT  | GTFAKAVLPC | QSPNFELEVA  |
| C1-1         | -----      | -----      | -----      | -----      | -----      | -----       |
| C1-2         | -----      | -----      | -----      | -----      | -----      | -----       |
| <i>mparl</i> | PVPDQASLAL | APPEPERKET | SGCSYQQINC | LDSILRYLES | CNIPSTTKRK | CASSSYTAS   |
| C1-1         | -----      | -----      | -----      | -----      | -----      | -----       |
| C1-2         | -----      | -----      | -----      | -----      | -----      | -----       |
| <i>mparl</i> | SASDDDKQRA | GPVPVGAKKD | PSSAMLSGEG | ATPRKEPVVG | GTLSPALAN  | KAESVSVVTS  |
| C1-1         | -----      | -----      | -----      | -----      | -----      | -----       |
| C1-2         | -----      | -----      | -----      | -----      | -----      | -----       |
| <i>mparl</i> | QCSFSSTIVH | VGDKKPFESD | IIMMEDLPGL | APGPAPSPAP | SPTVAPDPTP | DAYRPFVGLTK |
| C1-1         | -----      | -----      | -----      | -----      | -----      | -----       |
| C1-2         | -----      | -----      | -----      | -----      | -----      | -----       |
| <i>mparl</i> | AVLSLHTQKE | EQAFNLNFRD | LGRLRGLDTS | SVAFSAFGCH | HGPIPPGRRH | HCRSKAKRSR  |
| C1-1         | -----      | -----      | -----      | -----      | -----      | -----       |
| C1-2         | -----      | -----      | -----      | -----      | -----      | -----       |
| <i>mparl</i> | HHHHQTFRPE | TPCYVSHSPS | VPSSGFWPPP | PATTPFFAMV | QPYPLPVFSP | RGGPQLPFFA  |
| C1-1         | -----      | -----      | -----      | -----      | -----      | -----       |
| C1-2         | -----      | -----      | -----      | -----      | -----      | -----       |
| <i>mparl</i> | PTSVSPATFP | SPLVTPMVAL | VLPNYLFPTP | PSYPYGVSA  | PVEGPPTPAS | HSPSPSLPFP  |
| C1-1         | -----      | -----      | -----      | -----      | -----      | -----       |
| C1-2         | -----      | -----      | -----      | -----      | -----      | -----       |
| <i>mparl</i> | PLSPPHRPDS | PLFNRCSSP  | LQLNLLQLEE | SPRTEGAAA  | GGPGSSACPL | PFSEETAEP   |
| C1-1         | -----      | -----      | -----      | -----      | -----      | -----       |
| C1-2         | -----      | -----      | -----      | -----      | -----      | -----       |
| <i>mparl</i> | ARLVEVTESS | NQDALSGSSD | LLELLIQEDS | RSGTGSAASC | SLGSGLGSGS | SGSGHEGGST  |
| C1-1         | -----      | -----      | -----      | -----      | -----      | -----       |
| C1-2         | -----      | -----      | -----      | -----      | -----      | -----       |
| <i>mparl</i> | SASITRSSQS | SHTSKYFGSI | DSSEAEAGAA | RARTEPGDQV | IKCVLQDPIW | LLMANADQRV  |
| C1-1         | -----      | -----      | -----      | -----      | -----      | -----       |
| C1-2         | -----      | -----      | -----      | -----      | -----      | -----       |
| <i>mparl</i> | MMTYQVPSRD | AASVLKQDRE | RLRAMQKQPP | RFSEDQRREL | GAVHSWVRKG | QLPRALDVTA  |
| C1-1         | -----      | -----      | -----      | -----      | -----      | -----       |
| C1-2         | -----      | -----      | -----      | -----      | -----      | -----       |
| <i>mparl</i> | CVDOGSSVQD | PGHSDDPLFS | ELDGLGLEPM | EEGGEGGGC  | GVGGCGGDCG | EEAQTQIGAK  |
| C1-1         | -----      | -----      | -----      | -----      | -----      | -----       |
| C1-2         | -----      | -----      | -----      | -----      | -----      | -----       |
| <i>mparl</i> | GSSSQDSAME | EEEQGGGSSS | PALPAEENST | S*         | -----      | -----       |
| C1-1         | -----      | -----      | -----      | -----      | -----      | -----       |
| C1-2         | -----      | -----      | -----      | -----      | -----      | -----       |

**Figure S12.** Predicted translation products of both alleles in the *Per1* deletion cell strain (*Per1*-C1).



|              |            |            |            |            |            |            |
|--------------|------------|------------|------------|------------|------------|------------|
| <i>aper1</i> | MSGFLEGADG | GGDFRPCEPF | CPGGVPSPGA | PQHRPCPGPS | LADDTDANSN | GSSGNESNGP |
| E7-1         | MSGFLEGADG | GGDFRPCEPF | CPGGVPSPGA | PQHRPCPGPS | LADDTDANSN | GSSGNESNGP |
| E7-2         | MSGFLEGADG | GGDFRPCEPF | CPGGVPSPGA | PQHRPCPGPS | LADDTDANSN | GSSGNESNGP |
| <i>aper1</i> | *****      | *****      | *****      | *****      | *****      | *****      |
| E7-1         | ESRGASQRSS | HSSSSGNGKD | SALLETTESS | KSTNSQSPSP | PSSSIAYSL  | SASSEQDNPS |
| E7-2         | ESRGASQRSS | HSSSSGNGKD | SALLETTESS | KSTNSQSPSP | PSSSIAYSL  | SASSEQDNPS |
| <i>aper1</i> | *****      | *****      | *****      | *****      | *****      | *****      |
| E7-1         | TSGCSSEBQA | RARTQKELMT | ALRELKLRLP | PERRCKGRSG | TLATLQYALA | CVKQVQANQE |
| E7-2         | TSGCSSEBQA | RARTQKELMT | ALRELKLRLP | PERRCKGRSG | TLATLQYALA | CVKQVQANQE |
| <i>aper1</i> | *****      | *****      | *****      | *****      | *****      | *****      |
| E7-1         | YYQQWSLEEG | EPCAMDMSY  | TLEELEHITS | EYTLRNQDTF | SVAVSFLTGR | IVYISBQAGV |
| E7-2         | YYQQWSLEEG | EPCAMDMSY  | TLEELEHITS | EYTLRNQDTF | SVAVSFLTGR | IVYISBQAGV |
| <i>aper1</i> | *****      | *****      | *****      | *****      | *****      | *****      |
| E7-1         | LLRCKRDVFR | GARFSELLAP | QDVGVPYGST | TPSRLPTWGT | GTSAGSGLKD | FTQEKSVFCR |
| E7-2         | LLRCKRDVFR | GARFSELLAP | QDVGVPYGST | TPSRLPTWGT | GTSAGSGLKD | FTQEKSVFCR |
| <i>aper1</i> | *****      | *****      | *****      | *****      | *****      | *****      |
| E7-1         | IRGGPDRDPG | PRYQPFRLTP | YVTKIRVSDG | APAQPCCLLI | AERIHSGYEA | PRIPDPKRIF |
| E7-2         | IRGGPDRDPG | PRYQPFRLTP | YVTKIRVSDG | APAQPCCLLI | AERIHSGYEA | PRIPDPKRIF |
| <i>aper1</i> | *****      | *****      | *****      | *****      | *****      | *****      |
| E7-1         | TTRHTPSCLF | QDVDERAAPL | LGYPQLDLLG | APVLLFLHPE | DRPLMLAIHK | KILQLACQPF |
| E7-2         | TTRHTPSCLF | QDVDERAAPL | LGYPQLDLLG | APVLLFLHPE | DRPLMLAIHK | KILQLACQPF |
| <i>aper1</i> | *****      | *****      | *****      | *****      | *****      | *****      |
| E7-1         | DHSPIRFCAR | NCEYVTMDTS | WAGFVHPWSR | KVAFVLGRHK | VRTAPLNEDV | FTFPAPSPAP |
| E7-2         | DHSPIRFCAR | KRGICHGHQ  | LGRFCAPLEP | QGGFRVGS*  | CARHP*     | -----      |
| <i>aper1</i> | *****      | *****      | *****      | *****      | *****      | *****      |
| E7-1         | SLSDSIQELS | EQIHRLLQF  | VHSSSFTGLC | GVGPLMSPGF | LHSFGSSSDS | NGGDAEGFCP |
| E7-2         | -----      | -----      | -----      | -----      | -----      | -----      |
| <i>aper1</i> | PAPVTFQQIC | KDVHLVKHQG | QQLFIESRAK | PPPRPRLAT  | GTFKAKVLP  | QSFNPELEVA |
| E7-1         | -----      | -----      | -----      | -----      | -----      | -----      |
| E7-2         | -----      | -----      | -----      | -----      | -----      | -----      |
| <i>aper1</i> | PVPDQASLAL | AFEEPERKET | SGCSYQQINC | LDSILRYLES | CNIPSTTKRK | CASSSSYTAS |
| E7-1         | -----      | -----      | -----      | -----      | -----      | -----      |
| E7-2         | -----      | -----      | -----      | -----      | -----      | -----      |
| <i>aper1</i> | SASDDDKQRA | GPVPVGAKKD | PSSAMLSGEG | ATPRKEPVVG | GTLSPALAN  | KAESVSVSTS |
| E7-1         | -----      | -----      | -----      | -----      | -----      | -----      |
| E7-2         | -----      | -----      | -----      | -----      | -----      | -----      |
| <i>aper1</i> | QCSFSSTIVH | VGDKKPFESD | IIMMEDLPGL | APGPAPSPAP | SPTVAPDPTP | DAYRPVGLTK |
| E7-1         | -----      | -----      | -----      | -----      | -----      | -----      |
| E7-2         | -----      | -----      | -----      | -----      | -----      | -----      |
| <i>aper1</i> | AVLSLHTQKE | EQAFNLNFRD | LGRLRLDTS  | SVAPSPAGCH | HGPIPPGRRH | HCRSKAKRSR |
| E7-1         | -----      | -----      | -----      | -----      | -----      | -----      |
| E7-2         | -----      | -----      | -----      | -----      | -----      | -----      |
| <i>aper1</i> | HHHHQTPRPE | TPCYVSHFSP | VPSSGFWPPP | PATTPFFAMV | QPYPLPVFSP | RGGPQPLPPA |
| E7-1         | -----      | -----      | -----      | -----      | -----      | -----      |
| E7-2         | -----      | -----      | -----      | -----      | -----      | -----      |
| <i>aper1</i> | PTSVSPATFP | SPLVTPMVAL | VLPNYLFPTP | PSYPYGVSA  | PVEGPPTPAS | HSPSPSLPPP |
| E7-1         | -----      | -----      | -----      | -----      | -----      | -----      |
| E7-2         | -----      | -----      | -----      | -----      | -----      | -----      |
| <i>aper1</i> | PLSFPHRPDS | PLFNSRCSSP | LQLNLLQLEE | SPRTEGAAA  | GGPGSSAGPL | PPSEETAEP  |
| E7-1         | -----      | -----      | -----      | -----      | -----      | -----      |
| E7-2         | -----      | -----      | -----      | -----      | -----      | -----      |
| <i>aper1</i> | ARLVEVTESS | NQDALSGSSD | LLELLQEDS  | RSCTGSAASG | SLGSGLGSGS | GSGSHEGGST |
| E7-1         | -----      | -----      | -----      | -----      | -----      | -----      |
| E7-2         | -----      | -----      | -----      | -----      | -----      | -----      |
| <i>aper1</i> | SASITRSSQS | SHTSKYFGSI | DSSEAEAGAA | RARTEPGDQV | IKCVLQDPIW | LLMANADQRV |
| E7-1         | -----      | -----      | -----      | -----      | -----      | -----      |
| E7-2         | -----      | -----      | -----      | -----      | -----      | -----      |
| <i>aper1</i> | MMTYQVPSRD | AASVLKQDRE | RLRAMQKQQP | RFSEDQRREL | GAVHSWVRKG | QLFRALDVTA |
| E7-1         | -----      | -----      | -----      | -----      | -----      | -----      |
| E7-2         | -----      | -----      | -----      | -----      | -----      | -----      |
| <i>aper1</i> | CVDCGSSVQD | PGHSDDPLFS | ELDGLGLEFM | EEGGCEGGGC | GVGGGGDGC  | EFAQTQIGAK |
| E7-1         | -----      | -----      | -----      | -----      | -----      | -----      |
| E7-2         | -----      | -----      | -----      | -----      | -----      | -----      |
| <i>aper1</i> | GSSSQDSAME | EEEQGGGSSS | PALPAEENST | S*         | -----      | -----      |
| E7-1         | -----      | -----      | -----      | -----      | -----      | -----      |
| E7-2         | -----      | -----      | -----      | -----      | -----      | -----      |

**Figure S13.** Predicted translation products of both alleles in the *Per1* deletion cell strain (*Per1*-B7).

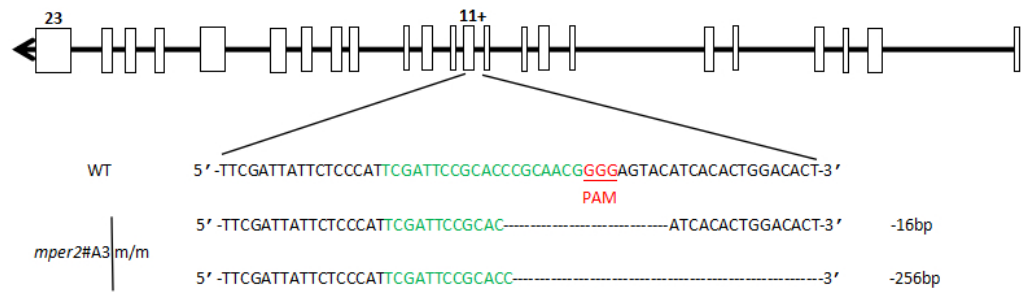

**Figure S14.** The sgRNA targeting the *Per2* gene and the sequences of both alleles in the *Per2* deletion cell strain.

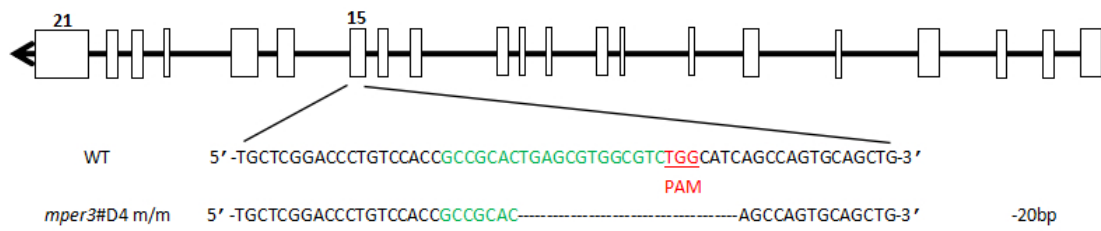

**Figure S15.** The sgRNA targeting the *Per3* gene and the sequences of both alleles in the *Per3* deletion cell strain.

|                         |             |            |            |            |            |             |
|-------------------------|-------------|------------|------------|------------|------------|-------------|
| <i>mp<sup>er3</sup></i> | MDPCGDPAVP  | GGDCPQTRGP | GLQGASQEG  | PLQGTCDVSS | HSEHEDRNRM | SEELIMVVQE  |
| D4-1/2                  | MDPCGDPAVP  | GGDCPQTRGP | GLQGASQEG  | PLQGTCDVSS | HSEHEDRNRM | SEELIMVVQE  |
|                         | *****       | *****      | *****      | *****      | *****      | *****       |
| <i>mp<sup>er3</sup></i> | MKKYFPAERH  | TKPSTLDALN | YALRCVHSVQ | ANSDFQSLG  | PRGAHQADVT | VYSLEDLTAL  |
| D4-1/2                  | MKKYFPAERH  | TKPSTLDALN | YALRCVHSVQ | ANSDFQSLG  | PRGAHQADVT | VYSLEDLTAL  |
|                         | *****       | *****      | *****      | *****      | *****      | *****       |
| <i>mp<sup>er3</sup></i> | ASEHTSKNTD  | TFAAVFSFLS | GRLVHISEQA | ALILNSKRGF | LKSVHFVDLL | APQDVRAFYA  |
| D4-1/2                  | ASEHTSKNTD  | TFAAVFSFLS | GRLVHISEQA | ALILNSKRGF | LKSVHFVDLL | APQDVRAFYA  |
|                         | *****       | *****      | *****      | *****      | *****      | *****       |
| <i>mp<sup>er3</sup></i> | HTAPTQLPFW  | NNWTQRASQY | ECAPAKPFFC | RICGGGDREK | RHYSFPRILP | YLVHVHSSAQ  |
| D4-1/2                  | HTAPTQLPFW  | NNWTQRASQY | ECAPAKPFFC | RICGGGDREK | RHYSFPRILP | YLVHVHSSAQ  |
|                         | *****       | *****      | *****      | *****      | *****      | *****       |
| <i>mp<sup>er3</sup></i> | PEPEPCCLTL  | VEKIHSGYEA | PRIPVDKRIF | TTTHTPGCVF | LEVDERAVPL | LGYPQDLIG   |
| D4-1/2                  | PEPEPCCLTL  | VEKIHSGYEA | PRIPVDKRIF | TTTHTPGCVF | LEVDERAVPL | LGYPQDLIG   |
|                         | *****       | *****      | *****      | *****      | *****      | *****       |
| <i>mp<sup>er3</sup></i> | TSILTYLHPE  | DRPLMVAIHQ | KVLKYAGHPP | FEHSPVRFCT | QNGEYVILDS | SWSSFVNPNWS |
| D4-1/2                  | TSILTYLHPE  | DRPLMVAIHQ | KVLKYAGHPP | FEHSPVRFCT | QNGEYVILDS | SWSSFVNPNWS |
|                         | *****       | *****      | *****      | *****      | *****      | *****       |
| <i>mp<sup>er3</sup></i> | RKVSFIIGRH  | KVRTSPLNED | VFATRIKKA  | SNDKDIAELQ | EQIHKLLQP  | VHASASSGYG  |
| D4-1/2                  | RKVSFIIGRH  | KVRTSPLNED | VFATRIKKA  | SNDKDIAELQ | EQIHKLLQP  | VHASASSGYG  |
|                         | *****       | *****      | *****      | *****      | *****      | *****       |
| <i>mp<sup>er3</sup></i> | SLGSSGSQEQ  | HVSITSSSES | SGHCPEEGQH | EQMTLQQVYA | SVNLIKNVGQ | QLYIESMARS  |
| D4-1/2                  | SLGSSGSQEQ  | HVSITSSSES | SGHCPEEGQH | EQMTLQQVYA | SVNLIKNVGQ | QLYIESMARS  |
|                         | *****       | *****      | *****      | *****      | *****      | *****       |
| <i>mp<sup>er3</sup></i> | SVKPVAETCV  | EPQGGDEQKD | FSSSQTLKNK | STTDGSGGN  | LQQEQPSSSY | QQMNCIDSVI  |
| D4-1/2                  | SVKPVAETCV  | EPQGGDEQKD | FSSSQTLKNK | STTDGSGGN  | LQQEQPSSSY | QQMNCIDSVI  |
|                         | *****       | *****      | *****      | *****      | *****      | *****       |
| <i>mp<sup>er3</sup></i> | RYLTSYSLPA  | LKRKCISCTN | TSSSSEAKP  | IPEVDSSQRD | TEQLLDIRKQ | ETGTPSTDIE  |
| D4-1/2                  | RYLTSYSLPA  | LKRKCISCTN | TSSSSEAKP  | IPEVDSSQRD | TEQLLDIRKQ | ETGTPSTDIE  |
|                         | *****       | *****      | *****      | *****      | *****      | *****       |
| <i>mp<sup>er3</sup></i> | GGAARTLSTA  | ALSVASGISQ | CSCSSTSGHA | PPLQSESVAV | ACKPWALRTK | ASHLAAGGFK  |
| D4-1/2                  | GGAARTLSTA  | AQPWQLQQHL | WPRSAPTVRK | CCRGV*—    | —          | —           |
|                         | *****       | *          |            |            |            |             |
| <i>mp<sup>er3</sup></i> | HVGLTAAVLS  | AHTQKEEQNY | VDRFREKILT | SPYGCYLQQE | SRNRAQYSCV | QAGSTAKHSR  |
| D4-1/2                  | —           | —          | —          | —          | —          | —           |
| <i>mp<sup>er3</sup></i> | CAGSERQKHK  | RKKLPAPVDT | SSPGAHLCPH | VTGLLPDEQH | WGPSASPSPL | GAGLAFPSAL  |
| D4-1/2                  | —           | —          | —          | —          | —          | —           |
| <i>mp<sup>er3</sup></i> | VVPSQTPYLL  | PSFPLQDMAS | QGVGVSAAWG | AAAGCPPLSA | GPQAVAAFPS | AYVDTLMTIF  |
| D4-1/2                  | —           | —          | —          | —          | —          | —           |
| <i>mp<sup>er3</sup></i> | LHNAPLFPLW  | PPSFSPYPSL | GAAGSSELAP | LVPAMAPNPE | PTTSGHSQRR | VEENWEAHSE  |
| D4-1/2                  | —           | —          | —          | —          | —          | —           |
| <i>mp<sup>er3</sup></i> | ELPFISSRSS  | SPLQLNLLQE | EMPAPSESAD | AVRRGAGPDA | KHHCVTGPSG | SRSRHCTSGE  |
| D4-1/2                  | —           | —          | —          | —          | —          | —           |
| <i>mp<sup>er3</sup></i> | LATATAQQUES | AAASGSSASS | IYFSSTDYAS | EVSENQRQPQ | DRQRDEALPG | AAEESIWRMI  |
| D4-1/2                  | —           | —          | —          | —          | —          | —           |
| <i>mp<sup>er3</sup></i> | ERTPECVLMT  | YQVPERGREE | VLKQDLEKLQ | SMEQQQPLFS | PAQREELAKV | RSWIHSHTAP  |
| D4-1/2                  | —           | —          | —          | —          | —          | —           |
| <i>mp<sup>er3</sup></i> | QEGHLQSCVA  | CEDRGSVGDT | AEVLEQHPAE | DTS*       |            |             |
| D4-1/2                  | —           | —          | —          | —          |            |             |

**Figure S16.** Predicted translation products of both alleles in the *Per3* deletion cell strain.

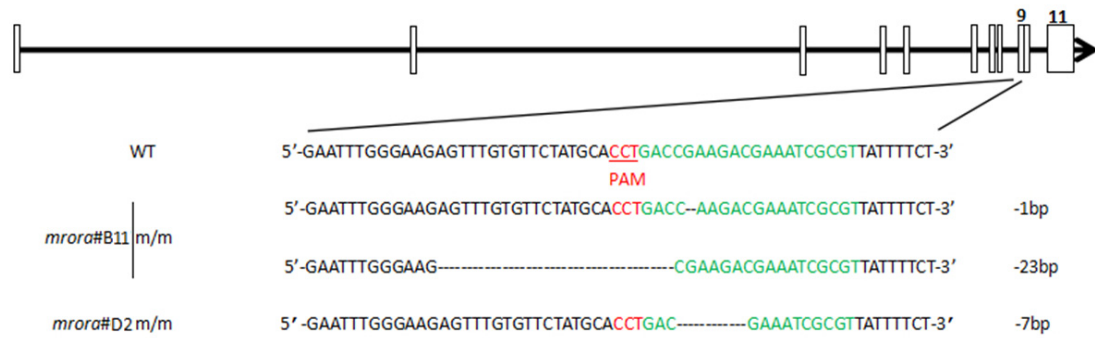

**Figure S17.** The sgRNA targeting the *Rora* gene and the sequences of both alleles in the *Rora* deletion cell strain.

|              |            |            |            |            |            |            |
|--------------|------------|------------|------------|------------|------------|------------|
| <i>mrora</i> | MESAPAAPDP | AASEPGSSGS | EAAGSRETP  | LTQDTGRKSE | APGAGRRQSY | ASSSRGISVT |
| B11-1        | MESAPAAPDP | AASEPGSSGS | EAAGSRETP  | LTQDTGRKSE | APGAGRRQSY | ASSSRGISVT |
| B11-2        | MESAPAAPDP | AASEPGSSGS | EAAGSRETP  | LTQDTGRKSE | APGAGRRQSY | ASSSRGISVT |
|              | *****      | *****      | *****      | *****      | *****      | *****      |
| <i>mrora</i> | KKTHTSQIEI | IPCKICGDKS | SGIHVGITC  | EGCKGFFRRS | QQSNATYSCP | RQKNCLIDRT |
| B11-1        | KKTHTSQIEI | IPCKICGDKS | SGIHVGITC  | EGCKGFFRRS | QQSNATYSCP | RQKNCLIDRT |
| B11-2        | KKTHTSQIEI | IPCKICGDKS | SGIHVGITC  | EGCKGFFRRS | QQSNATYSCP | RQKNCLIDRT |
|              | *****      | *****      | *****      | *****      | *****      | *****      |
| <i>mrora</i> | SRNRCQHCL  | QKCLAVGMSR | DAVKFGRMSK | KQRDSLAEV  | QKHRMQQQR  | DHQQQPGEAE |
| B11-1        | SRNRCQHCL  | QKCLAVGMSR | DAVKFGRMSK | KQRDSLAEV  | QKHRMQQQR  | DHQQQPGEAE |
| B11-2        | SRNRCQHCL  | QKCLAVGMSR | DAVKFGRMSK | KQRDSLAEV  | QKHRMQQQR  | DHQQQPGEAE |
|              | *****      | *****      | *****      | *****      | *****      | *****      |
| <i>mrora</i> | PLTPTYNISA | NGLTELHDDL | STYMDGHTPE | GSKADSAVSS | FYLDIQSPD  | QSGLDINGIK |
| B11-1        | PLTPTYNISA | NGLTELHDDL | STYMDGHTPE | GSKADSAVSS | FYLDIQSPD  | QSGLDINGIK |
| B11-2        | PLTPTYNISA | NGLTELHDDL | STYMDGHTPE | GSKADSAVSS | FYLDIQSPD  | QSGLDINGIK |
|              | *****      | *****      | *****      | *****      | *****      | *****      |
| <i>mrora</i> | PEPICDYTPA | SGFFPYCSFT | NGETSPTVSM | AELEHLAQNI | SKSHLETCQY | LREELQQITW |
| B11-1        | PEPICDYTPA | SGFFPYCSFT | NGETSPTVSM | AELEHLAQNI | SKSHLETCQY | LREELQQITW |
| B11-2        | PEPICDYTPA | SGFFPYCSFT | NGETSPTVSM | AELEHLAQNI | SKSHLETCQY | LREELQQITW |
|              | *****      | *****      | *****      | *****      | *****      | *****      |
| <i>mrora</i> | QTFLQEEIEN | YQNKQREVMW | QLCAIKITEA | IQYVVEFAKR | IDGFMELCQN | DQIVLLKAGS |
| B11-1        | QTFLQEEIEN | YQNKQREVMW | QLCAIKITEA | IQYVVEFAKR | IDGFMELCQN | DQIVLLKAGS |
| B11-2        | QTFLQEEIEN | YQNKQREVMW | QLCAIKITEA | IQYVVEFAKR | IDGFMELCQN | DQIVLLKAGS |
|              | *****      | *****      | *****      | *****      | *****      | *****      |
| <i>mrora</i> | LEVVFIRMCR | AFDSQNNTVY | FDGKYASPDV | FKSLGCEDFI | SFVFEFGKSL | CSMHLTEDEI |
| B11-1        | LEVVFIRMCR | AFDSQNNTVY | FDGKYASPDV | FKSLGCEDFI | SFVFEFGKRR | RNRVIFCIRT |
| B11-2        | LEVVFIRMCR | AFDSQNNTVY | FDGKYASPDV | FKSLGCEDFI | SFVFEFGKSL | CSMHLTKTKS |
|              | *****      | *****      | *****      | *****      | *****      | *****      |
| <i>mrora</i> | ALFSAFVLMS | ADRSWLQEKV | KIEKLQQKIQ | LALQHVLLQN | HREDGILTKL | ICKVSTLRAL |
| B11-1        | DVSGSLVASG | KGKNRKAATE | NSAGPSARPT | EEPPRRWNSN | QANMQGVYVK | SPMWTTYGKA |
| B11-2        | RYFLHSY*—  | —          | —          | —          | —          | —          |
| <i>mrora</i> | CGRHTEKLMA | FKAIYPDIWR | LHFPPLYKEL | FTSEFEPAMQ | IDG*       |            |
| B11-1        | NGI*—      | —          | —          | —          | —          |            |
| B11-2        | —          | —          | —          | —          | —          |            |

**Figure S18.** Predicted translation products of both alleles in the *Rora* deletion cell strain (*Rora*-B11).

|              |            |            |            |            |            |            |
|--------------|------------|------------|------------|------------|------------|------------|
| <i>mrora</i> | MESAPAAPDP | AASEPGSSGS | AAAAGSRETP | LTQDTGRKSE | APGAGRQSY  | ASSSRGISVT |
| D2-1/2       | MESAPAAPDP | AASEPGSSGS | AAAAGSRETP | LTQDTGRKSE | APGAGRQSY  | ASSSRGISVT |
|              | *****      | *****      | *****      | *****      | *****      | *****      |
| <i>mrora</i> | KKTHTSQIEI | IPCKICGDKS | SGIHYGVITC | EGCKGFFRRS | QQSNATYSCP | RQKNCLIDRT |
| D2-1/2       | KKTHTSQIEI | IPCKICGDKS | SGIHYGVITC | EGCKGFFRRS | QQSNATYSCP | RQKNCLIDRT |
|              | *****      | *****      | *****      | *****      | *****      | *****      |
| <i>mrora</i> | SRNRCQHCR  | L          | QKCLAVGMSR | DAVKFGRMSK | KQRDSLYAEV | QKHRMQQQQR |
| D2-1/2       | SRNRCQHCR  | L          | QKCLAVGMSR | DAVKFGRMSK | KQRDSLYAEV | QKHRMQQQQR |
|              | *****      | *****      | *****      | *****      | *****      | *****      |
| <i>mrora</i> | PLTPTYNISA | NGLTELHDDL | STYMDGHTPE | GSKADSAVSS | FYLDIQSPD  | QSGLDINGIK |
| D2-1/2       | PLTPTYNISA | NGLTELHDDL | STYMDGHTPE | GSKADSAVSS | FYLDIQSPD  | QSGLDINGIK |
|              | *****      | *****      | *****      | *****      | *****      | *****      |
| <i>mrora</i> | PEPICDYTPA | SGFFPYCSFT | NGETSPTVSM | AELEHLAQNI | SKSHLETCQY | LREELQQITW |
| D2-1/2       | PEPICDYTPA | SGFFPYCSFT | NGETSPTVSM | AELEHLAQNI | SKSHLETCQY | LREELQQITW |
|              | *****      | *****      | *****      | *****      | *****      | *****      |
| <i>mrora</i> | QTFLQEEIEN | YQNKQREVMW | QLCAIKITEA | IQYVVEFAKR | IDGFMELCQN | DQIVLLKAGS |
| D2-1/2       | QTFLQEEIEN | YQNKQREVMW | QLCAIKITEA | IQYVVEFAKR | IDGFMELCQN | DQIVLLKAGS |
|              | *****      | *****      | *****      | *****      | *****      | *****      |
| <i>mrora</i> | LEVVFIRMCR | AFDSQNNIVY | FDGKYASPDV | FKSLGCEDFI | SFVFEPGKSL | CSMHLTEDEI |
| D2-1/2       | LEVVFIRMCR | AFDSQNNIVY | FDGKYASPDV | FKSLGCEDFI | SFVFEPGKSL | CSMHLTKSRY |
|              | *****      | *****      | *****      | *****      | *****      | *****      |
| <i>mrora</i> | ALFSAFVLMS | ADRSWLQEKV | KIEKLQKKIQ | LALQHVLRQN | HREDGILTKL | ICKVSTLRAL |
| D2-1/2       | FLHSY*     | -----      | -----      | -----      | -----      | -----      |
| <i>mrora</i> | CGRHTEKLMA | FKAIYPDIVR | LHFPPLYKEL | FTSEFEPAMQ | IDG*       |            |
| D2-1/2       | -----      | -----      | -----      | -----      | -----      |            |

**Figure S19.** Predicted translation products of both alleles in the *Rora* deletion cell strain (*Rora*-D2).

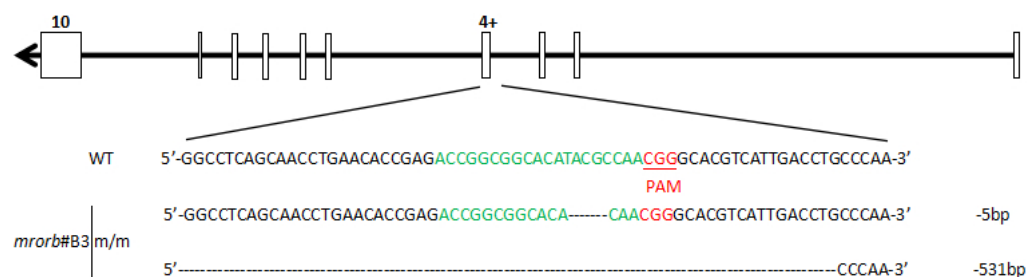

**Figure S20.** The sgRNA targeting the *Rorb* gene and the sequences of both alleles in the *Rorb* deletion cell strain.

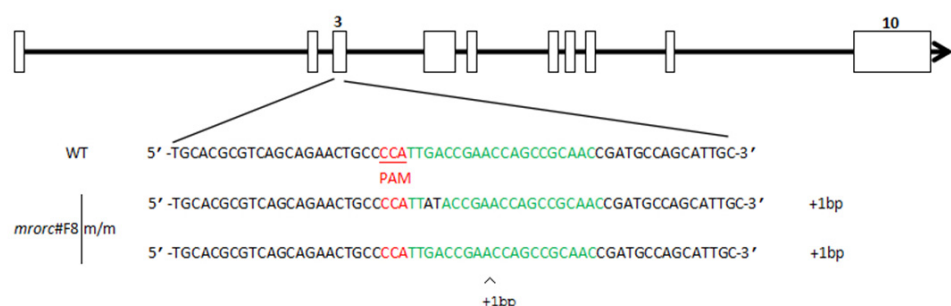

**Figure S21.** The sgRNA targeting the *Rorc* gene and the sequences of both alleles in the *Rorc* deletion cell strain.



|              |             |            |            |             |            |            |
|--------------|-------------|------------|------------|-------------|------------|------------|
| <i>rrorc</i> | MRTQIEVIPC  | KICGDKSSGI | HYGVITCEGC | KGFFRRSQQC  | NVAYSCTRQQ | NCPIDRTSRN |
| F8-1         | MRTQIEVIPC  | KICGDKSSGI | HYGVITCEGC | KGFFRRSQQC  | NVAYSCTRQQ | NCPIIPNQPQ |
| F8-2         | MRTQIEVIPC  | KICGDKSSGI | HYGVITCEGC | KGFFRRSQQC  | NVAYSCTRQQ | NCPIEPNQPQ |
|              | *****y      | *****      | *****      | *****       | *****      | ****_      |
| <i>rrorc</i> | RCQHCLRLQKC | LALGMSRDAV | KFGRMSKKQR | DSLHAEVQKQ  | LQQQQQQEQV | AKTPPAGSRG |
| F8-1         | PMPALPPAEV  | PGSGHVPRCC | QVWPNVQEAE | GQSTCRSAET  | TATAAATGTS | GQDSSSWEPR |
| F8-2         | PMPALPPAEV  | PGSGHVPRCC | QVWPNVQEAE | GQSTCRSAET  | TATAAATGTS | GQDSSSWEPR |
| <i>rrorc</i> | ADTLTYTLGL  | SDGQLPLGAS | PDLPEASACP | PGLLRASGSG  | PPYSNTLAKT | EVQGASCHLE |
| F8-1         | SRHTYIHFR   | LRWAATTGRL | T*_____    | _____       | _____      | _____      |
| F8-2         | SRHTYIHFR   | LRWAATTGRL | T*_____    | _____       | _____      | _____      |
| <i>rrorc</i> | YSPERGKAEG  | RDSIYSTDGG | LTLCRCGLRF | EETRHPPELGE | PEQGPDSHCI | PSFCSAPEVP |
| F8-1         | _____       | _____      | _____      | _____       | _____      | _____      |
| F8-2         | _____       | _____      | _____      | _____       | _____      | _____      |
| <i>rrorc</i> | YASLTDIEYL  | VQNVCKSFRE | TCQLRLEDLL | RQRTNLFSSRE | EVTSYQRKSM | WEMWERCAHH |
| F8-1         | _____       | _____      | _____      | _____       | _____      | _____      |
| F8-8         | _____       | _____      | _____      | _____       | _____      | _____      |
| <i>rrorc</i> | LTEAIQYVVE  | FAKRLSGFME | LCQNDQIILL | KAGAMEVVLV  | RMCRAYNANN | HTVFFEGKYG |
| F8-1         | _____       | _____      | _____      | _____       | _____      | _____      |
| F8-8         | _____       | _____      | _____      | _____       | _____      | _____      |
| <i>rrorc</i> | LTEAIQYVVE  | FAKRLSGFME | LCQNDQIILL | KAGAMEVVLV  | RMCRAYNANN | HTVFFEGKYG |
| F8-1         | _____       | _____      | _____      | _____       | _____      | _____      |
| F8-2         | _____       | _____      | _____      | _____       | _____      | _____      |
| <i>rrorc</i> | GVELFRALGC  | SELISSIFDF | SHFLSALCFS | EDEIALYTAL  | VLINANRPGL | QEKRRVEHLQ |
| F8-1         | _____       | _____      | _____      | _____       | _____      | _____      |
| F8-2         | _____       | _____      | _____      | _____       | _____      | _____      |
| <i>rrorc</i> | GVELFRALGC  | SELISSIFDF | SHFLSALCFS | EDEIALYTAL  | VLINANRPGL | QEKRRVEHLQ |
| F8-1         | _____       | _____      | _____      | _____       | _____      | _____      |
| F8-2         | _____       | _____      | _____      | _____       | _____      | _____      |
| <i>rrorc</i> | YNLELAFHHH  | LCKTHRQGLL | AKLPPKGKLR | SLCSQHWEKL  | QIFQHLHPIV | VQAAFPPLYK |
| F8-1         | _____       | _____      | _____      | _____       | _____      | _____      |
| F8-2         | _____       | _____      | _____      | _____       | _____      | _____      |
| <i>rrorc</i> | ELFSTDVESP  | EGLSK*     |            |             |            |            |
| F8-1         | _____       | _____      |            |             |            |            |
| F8-2         | _____       | _____      |            |             |            |            |

**Figure S22.** Predicted translation products of both alleles in the *Rorc* deletion cell strain.





|                   |            |             |             |            |             |             |
|-------------------|------------|-------------|-------------|------------|-------------|-------------|
| <i>mbeta-trcp</i> | MDPAEAVLQE | KALKFMC SMP | RSLWLGCS SL | ADSMPSLRCL | YNPGTGALTA  | FQNSSEREDC  |
| D11-1             | MDPAEAVLQE | KALKFMC SMP | RSLWLGCS SL | ADSMPSLRCL | YNPGTGALTA  | FQNSSEREDC  |
| D11-2             | MDPAEAVLQE | KALKFMC SMP | RSLWLGCS SL | ADSMPSLRCL | YNPGTGALTA  | FQNSSEREDC  |
|                   | *****      | *****       | *****       | *****      | *****       | *****       |
| <i>mbeta-trcp</i> | NNGEPPRKII | PEKNSLRQTY  | NSCARLCINQ  | ETVCLTSTAM | KTENCVAKAK  | LANGTSSMIV  |
| D11-1             | NNGEPPRKII | PEKNSLRQTY  | NSCARLCINQ  | ETVCLTSTAM | KTENCVAKAK  | LANGTSSMIV  |
| D11-2             | NNGEPPRKII | PEKNSLRQTY  | NSCARLCINQ  | ETVCLTSTAM | KTENCVAKAK  | LANGTSSMIV  |
|                   | *****      | *****       | *****       | *****      | *****       | *****       |
| <i>mbeta-trcp</i> | PKQRKLSASY | EKEKELCVKY  | FEQWSESDQV  | EFVEHLISQM | CHYQHG HINS | YLPKMLQRDF  |
| D11-1             | PKQRKLSASY | EKEKELCVKY  | FEQWSESDQV  | EFVEHLISQM | CHYQHG HINS | YLPKMLQRDF  |
| D11-2             | PKQRKLSASY | EKEKELCVKY  | FEQWSESDQV  | EFVEHLISQM | CHYQHG HINS | YLPKMLQRDF  |
|                   | *****      | *****       | *****       | *****      | *****       | *****       |
| <i>mbeta-trcp</i> | ITALPARGLD | HIAENILSYL  | DAKSLCAAEL  | VCKEWYRVTS | DGMLWKKLIE  | RMVRTDSLWR  |
| D11-1             | ITALPARGLD | HIAENILSYL  | DAKSLCAAEL  | VCKEW      | KKLIE       | RMVRTDSLWR  |
| D11-2             | ITALPARGLD | HIAENILSYL  | DAKSLCAAEL  | VCKEWYRVTS | GRHAVEKAHR  | EDGQDGLSVA  |
|                   | *****      | *****       | *****       | *****      | *****       | *****       |
| <i>mbeta-trcp</i> | GLAERRGWGQ | YLFKNKPPDE  | NAPPNSFYRA  | LYPKIIQDIE | TIESNWRCCR  | HSLQRIHCRS  |
| D11-1             | GLAERRGWGQ | YLFKNKPPDE  | NAPPNSFYRA  | LYPKIIQDIE | TIESNWRCCR  | HSLQRIHCRS  |
| D11-2             | RPCRAQRLGT | VLIQKQTS*-  |             |            |             |             |
| <i>mbeta-trcp</i> | ETSKGVYCLQ | YDDQKIVSGL  | RDNTIKIWDK  | STLECKRILT | GHTGSVLC LQ | YDERVIITGS  |
| D11-1             | ETSKGVYCLQ | YDDQKIVSGL  | RDNTIKIWDK  | STLECKRILT | GHTGSVLC LQ | YDERVIITGS  |
| D11-2             |            |             |             |            |             |             |
| <i>mbeta-trcp</i> | SDSTVRVWDV | NAGEMLNTLI  | HHCEAVLHLR  | FNNGMMVTCS | KDRSIAVWDM  | ASPTDITLRR  |
| D11-1             | SDSTVRVWDV | NAGEMLNTLI  | HHCEAVLHLR  | FNNGMMVTCS | KDRSIAVWDM  | ASPTDITLRR  |
| D11-2             |            |             |             |            |             |             |
| <i>mbeta-trcp</i> | VLVGHRAAVN | VVDFDDKYIV  | SASGDRTIKV  | WNTSTCEFVR | TLNGHKRGIA  | CLQYRDRLVV  |
| D11-1             | VLVGHRAAVN | VVDFDDKYIV  | SASGDRTIKV  | WNTSTCEFVR | TLNGHKRGIA  | CLQYRDRLVV  |
| D11-2             |            |             |             |            |             |             |
| <i>mbeta-trcp</i> | SGSSDNTIRL | WDIECGACLR  | VLEGHEELVR  | CIRFDNKRIV | SGAYDGKIKV  | WDLMAALDPR  |
| D11-1             | SGSSDNTIRL | WDIECGACLR  | VLEGHEELVR  | CIRFDNKRIV | SGAYDGKIKV  | WDLMAALDPR  |
| D11-2             |            |             |             |            |             |             |
| <i>mbeta-trcp</i> | APAGTLCLRT | LVEHSGRVFR  | LQFDEFQIVS  | SSHDDTILIW | DFLNDPAAHA  | EPPRSPSR TY |
| D11-1             | APAGTLCLRT | LVEHSGRVFR  | LQFDEFQIVS  | SSHDDTILIW | DFLNDPAAHA  | EPPRSPSR TY |
| D11-2             |            |             |             |            |             |             |
| <i>mbeta-trcp</i> | TYISR*     |             |             |            |             |             |
| D11-1             | TYISR*     |             |             |            |             |             |
| D11-2             |            |             |             |            |             |             |

**Figure S25.** Predicted translation products of both alleles in the *Beta-trcp* deletion cell (D11).

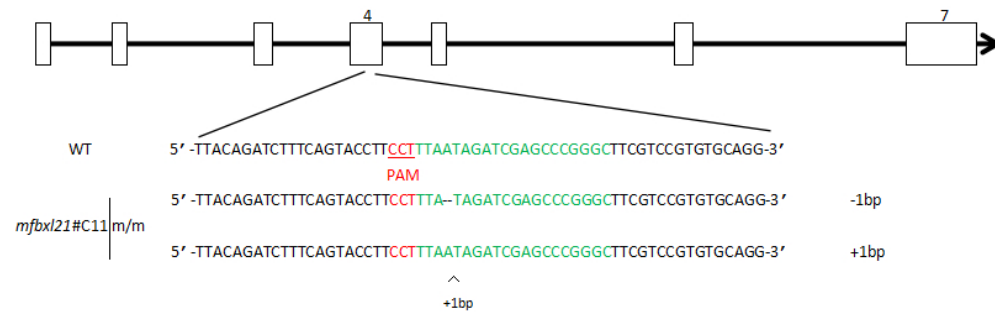

**Figure S26.** The sgRNA targeting the *Fbxl21* gene and the sequences of both alleles in the *Fbxl21* deletion cell strain.

|                |             |            |             |             |             |            |
|----------------|-------------|------------|-------------|-------------|-------------|------------|
| <i>mfbxl21</i> | MKRNNFSAVN  | KVVQSSPVVK | QPKRGLCSSL  | RQTHALSVLL  | DWGTLP HHVI | LQIFQYLPLI |
| C11-1          | MKRNNFSAVN  | KVVQSSPVVK | QPKRGLCSSL  | RQTHALSVLL  | DWGTLP HHVI | LQIFQYLPLN |
| C11-2          | MKRNNFSAVN  | KVVQSSPVVK | QPKRGLCSSL  | RQTHALSVLL  | DWGTLP HHVI | LQIFQYLPL* |
|                | *****       | *****      | *****       | *****       | *****       | *****      |
| <i>mfbxl21</i> | DRARASSVCR  | RWNEVFHIPD | LWRKFEBELN  | QSATSYFKST  | HPDLIQIIK   | KHAAHLQYVS |
| C11-1          | RSSPGFVRVQ  | EME*       |             |             |             |            |
| C11-2          |             |            |             |             |             |            |
| <i>mfbxl21</i> | FKVDSSTESA  | EAACDILSQL | VNCSIQTLGL  | ISTAKPSFMN  | VPKSHFVSAL  | TVVFN SKSL |
| C11-1          |             |            |             |             |             |            |
| C11-2          |             |            |             |             |             |            |
| <i>mfbxl21</i> | SSIKIEDTPV  | DDPSLKILVA | NNSDTLRLK   | MSSCPHVSSD  | GILCVADHCQ  | GLRELALNYY |
| C11-1          |             |            |             |             |             |            |
| C11-2          |             |            |             |             |             |            |
| <i>mfbxl21</i> | ILSDEILLAL  | SSETHVNLEH | LRIDVVS ENP | GQIKFHSIKK  | RSWDALIKHS  | PRVNVVMYFF |
| C11-1          |             |            |             |             |             |            |
| C11-2          |             |            |             |             |             |            |
| <i>mfbxl21</i> | LYEEEF EAFV | KEETPVTHLY | FGRSVSRAIL  | GRIGLNC PRL | IELVVCANGL  | LPLDSELIRI |
| C11-1          |             |            |             |             |             |            |
| C11-2          |             |            |             |             |             |            |
| C11-1          |             |            |             |             |             |            |
| C11-2          |             |            |             |             |             |            |
| <i>mfbxl21</i> | LYEEEF EAFV | KEETPVTHLY | FGRSVSRAIL  | GRIGLNC PRL | IELVVCANGL  | LPLDSELIRI |
| C11-1          |             |            |             |             |             |            |
| C11-2          |             |            |             |             |             |            |
| <i>mfbxl21</i> | AKHCKNLTSL  | GLSECEVSCS | AFVEFVR LCG | RRLTQLSIME  | EVLVPDDRYT  | PDEVHTEVSK |
| C11-1          |             |            |             |             |             |            |
| C11-2          |             |            |             |             |             |            |
| <i>mfbxl21</i> | HLGRVWF PDV | MPIW*      |             |             |             |            |
| C11-1          |             |            |             |             |             |            |
| C11-2          |             |            |             |             |             |            |

**Figure S27.** Predicted translation products of both alleles in the *Fbxl21* deletion cell.

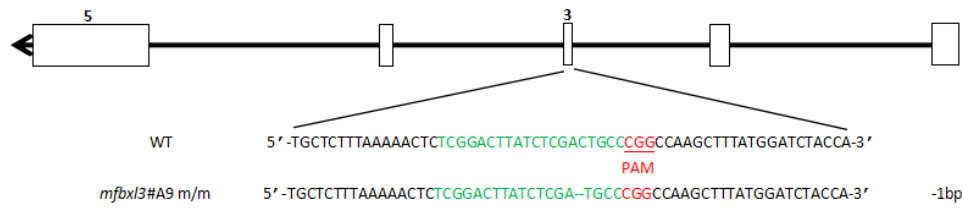

**Figure S28.** The sgRNA targeting the *Fbxl3* gene and the sequences of both alleles in the *Fbxl3* deletion cell strain.

|               |             |            |            |            |            |            |
|---------------|-------------|------------|------------|------------|------------|------------|
| <i>mfbxl3</i> | MKRGGGRSDQ  | DSAEEGTAEK | PKRPRTTQER | SQPCDWGNLL | QDIVLHVFKY | LPLLDRAHAS |
| F7-1/2        | MKRGGGRSDQ  | DSAEEGTAEK | PKRPRTTQER | SQPCDWGNLL | QDIVLHVFKY | LPLLDRAHAS |
|               | *****       | *****      | *****      | *****      | *****      | *****      |
| <i>mfbxl3</i> | QVCRNWNQVF  | HMPDLWRCFE | FELNQPATSY | LKATHPELIK | QIIKRHSNHL | QYVSFKVDSS |
| F7-1/2        | QVCRNWNQVF  | HMPDLWRCFE | FELNQPATSY | LKATHPELIK | QIIKRHSNHL | QYVSFKVDSS |
|               | *****       | *****      | *****      | *****      | *****      | *****      |
| <i>mfbxl3</i> | KESAEAAACDI | LSQLVNCSLK | TLGLISTARP | SFMDLPKSHF | ISALTVVFVN | SKSLSSLKID |
| F7-1/2        | KESAEAAACDI | LSQLVNCSLK | TLGLISMPGQ | ALWIYQSLTL | SLH*       | -----      |
|               | *****       | *****      | *****      |            |            |            |
| <i>mfbxl3</i> | DTPVDDPSLK  | VLVANNSDTL | KLLKMSSCPH | VSPAGILCVA | DQCHGLRELA | LNYHLLSDEL |
| F7-1/2        | -----       | -----      | -----      | -----      | -----      | -----      |
| <i>mfbxl3</i> | LLALSSEKHV  | RLEHLRIDVV | SENPQGTHFH | TIQKSSWDAF | IKHSPKVMNV | MYFFLYBEEF |
| F7-1/2        | -----       | -----      | -----      | -----      | -----      | -----      |
| <i>mfbxl3</i> | DPFFRYEIPA  | THLYFGRSVS | KDVLGRVGMT | CPRLVELVVC | ANGLRPLDEE | LIRIAERCKN |
| F7-1/2        | -----       | -----      | -----      | -----      | -----      | -----      |
| <i>mfbxl3</i> | LSAIGLGECE  | VSCSAFVEFV | KMCGGRLSQL | SIMEEVLIPD | QKYSLEQIHW | EVSKHLGRVW |
| F7-1/2        | -----       | -----      | -----      | -----      | -----      | -----      |
| <i>mfbxl3</i> | FPDMMPW*    |            |            |            |            |            |
| F7-1/2        | -----       |            |            |            |            |            |

**Figure S29.** Predicted translation products of both alleles in the *Fbxl3* deletion cell.

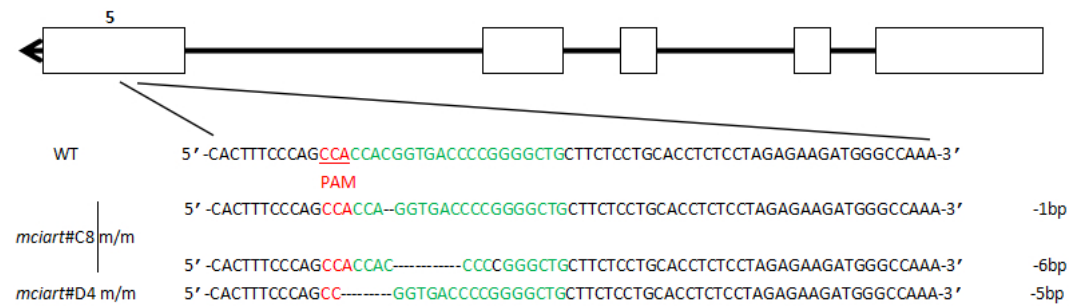

**Figure S30.** The sgRNA targeting the *Ciart* gene and the sequences of both alleles in the *Ciart* deletion cell strain.

|               |            |            |            |            |            |            |
|---------------|------------|------------|------------|------------|------------|------------|
| <i>mciart</i> | MDSPSSVSSY | SSSSLSPSFS | TSSVNSDFS  | PSDNEREGKG | THELRPDTVG | QRGGSRPSPG |
| C8-1          | MDSPSSVSSY | SSSSLSPSFS | TSSVNSDFS  | PSDNEREGKG | THELRPDTVG | QRGGSRPSPG |
| C8-2          | MDSPSSVSSY | SSSSLSPSFS | TSSVNSDFS  | PSDNEREGKG | THELRPDTVG | QRGGSRPSPG |
|               | *****      | *****      | *****      | *****      | *****      | *****      |
| <i>mciart</i> | PIRCRHRPRV | SSNQHTAPHL | EQQGSEVKRS | RDGEQETSLN | TQGCTTEGDL | LFAQKCKELQ |
| C8-1          | PIRCRHRPRV | SSNQHTAPHL | EQQGSEVKRS | RDGEQETSLN | TQGCTTEGDL | LFAQKCKELQ |
| C8-2          | PIRCRHRPRV | SSNQHTAPHL | EQQGSEVKRS | RDGEQETSLN | TQGCTTEGDL | LFAQKCKELQ |
|               | *****      | *****      | *****      | *****      | *****      | *****      |
| <i>mciart</i> | GFIRPLDLL  | NGLKMGRFDR | GLSSFQSSVA | MDRIQRIVGV | LQKPQMGERY | LGTLLQVEGM |
| C8-1          | GFIRPLDLL  | NGLKMGRFDR | GLSSFQSSVA | MDRIQRIVGV | LQKPQMGERY | LGTLLQVEGM |
| C8-2          | GFIRPLDLL  | NGLKMGRFDR | GLSSFQSSVA | MDRIQRIVGV | LQKPQMGERY | LGTLLQVEGM |
|               | *****      | *****      | *****      | *****      | *****      | *****      |
| <i>mciart</i> | LKTWFPPIAA | QKSSSGGSRH | QISKHFPSHH | GDPGAASPAP | LLEKMGQTQL | GHLVLKPKQP |
| C8-1          | LKTWFPPIAA | QKSSSGGSRH | QISKHFPSHH | —PRAASPAP  | LLEKMGQTQL | GHLVLKPKQP |
| C8-2          | LKTWFPPIAA | QKSSSGGSRH | QISKHFPSHQ | VTPGLLLLHL | S*         | —————      |
|               | *****      | *****      | *****      |            |            |            |
| <i>mciart</i> | WHLTGWPAMN | LTWIHSTPIC | NPPLSSQGSA | SGHSPIGTGA | SIGVILVLQK | GGQPFTHSAP |
| C8-1          | WHLTGWPAMN | LTWIHSTPIC | NPPLSSQGSA | SGHSPIGTGA | SIGVILVLQK | GGQPFTHSAP |
| C8-2          | —————      | —————      | —————      | —————      | —————      | —————      |
| <i>mciart</i> | GTPVPPTPLS | PVVPGDLKKL | PGEEPRCHSL | PVTLPDWS   | ILCPPVLPTT | DREMTKGHPE |
| C8-1          | GTPVPPTPLS | PVVPGDLKKL | PGEEPRCHSL | PVTLPDWS   | ILCPPVLPTT | DREMTKGHPE |
| C8-2          | —————      | —————      | —————      | —————      | —————      | —————      |
| <i>mciart</i> | PQMTSHPPVA | PDPQP*     |            |            |            |            |
| C8-1          | PQMTSHPPVA | PDPQP*     |            |            |            |            |
| C8-2          | —————      | —————      |            |            |            |            |

**Figure S31.** Predicted translation products of both alleles in the *Ciart* deletion cell (C8).



|              |            |            |            |             |            |            |
|--------------|------------|------------|------------|-------------|------------|------------|
| <i>mdec1</i> | MERIPSAQPP | PTCLPKAPGL | EHGDLSGMDF | AHMYQVYKSR  | RGIKRSEDSK | ETYKLPHRLI |
| D8-1         | MERIPSAQPP | PTCLPKAPGL | EHGDLSGMDF | AHMYQVYKSR  | RGIKRSEDSK | ETYKLPHRLI |
| D8-2         | MERIPSAQPP | PTCLPKAPGL | EHGDLSGMDF | AHMYQVYKSR  | RGIKRSEDSK | ETYKLPHRLI |
|              | *****      | *****      | *****      | *****       | *****      | *****      |
| <i>mdec1</i> | EKKRRDRINE | CIAQLKDLLP | EHLKLTTLGH | LEKAVVLELT  | LKHVKALTNL | IDQQQQKIIA |
| D8-1         | EKKRRDRINE | CIAQLKDLLP | EHLKLTTLGH | LEKAVVLELT  | LKHVKALTNL | IDQQQQKIIA |
| D8-2         | EKKRRDRINE | CIAQLKDLLP | EHLKLTTLGH | LEKAVVLELT  | LKHVKALTNL | IDQQQQKIIA |
|              | *****      | *****      | *****      | *****       | *****      | *****      |
| <i>mdec1</i> | LQSGLQAGDL | SGRNLEAGQE | MFCSGFQTCA | REVLQYLAKH  | ENTRDLKSSQ | LVTHLHRVVS |
| D8-1         | LQSGLQAGDL | SGRNLEAGQE | MFCSGFQTCA | REVLQYLAKH  | ENTRDLKSSQ | LVTHLHRVVS |
| D8-2         | LQSGLQAGDL | SGRNLEAGQE | MFCSGFQTCA | REVLQYLAKH  | ENTRDLKSSQ | LVTHLHRVVS |
|              | *****      | *****      | *****      | *****       | *****      | *****      |
| <i>mdec1</i> | ELLQGGASRK | PLDSAPKAVD | LKEKPSFLAK | GSEGP GKNCV | PVIQRTFAPS | GGEQSGSDTD |
| D8-1         | ELLQGGASRK | PLDSAPKAVD | LKEKPSFLAK | GSEGP GKNCV | PVIQRTFAPS | GGEQSGSDTD |
| D8-2         | ELLQGGASRK | PLDSAPKAVD | LKEKPSFLAK | GSEGP GKNCV | PVIQRTFAPS | GGEQSGSDTD |
|              | *****      | *****      | *****      | *****       | *****      | *****      |
| <i>mdec1</i> | TDSGYGGELE | KGDLRSEQPY | FKSDHGRRFA | VGERVSTIKQ  | ESEEPPTKKS | RMQLSEEEGH |
| D8-1         | TDSGYGGELE | KGDLRSEQPY | FKSDHGRRF  | GRTCQHN*—   | ————       | ————       |
| D8-2         | TDSGYGGELE | KGDLRSEQPY | FKSDHGPIRS | LPAKWENVSA  | QLSKNPKSPP | PKRAECSSQK |
|              | *****      | *****      | *****      |             |            |            |
|              |            |            |            |             |            |            |
| <i>mdec1</i> | FAGSDLMGSP | FLGPHPHQPP | FCLPFYLIPP | SATAYLPMLE  | KCWYPTSWPV | LYPGLNTSAA |
| D8-1         | ————       | ————       | ————       | ————        | ————       | ————       |
| D8-2         | RKATSRVI*  | ————       | ————       | ————        | ————       | ————       |
|              |            |            |            |             |            |            |
| <i>mdec1</i> | ALSSFMNPDK | IPTPLLLPQR | LPSPLAHSSL | DSSALLQALK  | QIPPLNLETK | D*         |
| D8-1         | ————       | ————       | ————       | ————        | ————       | ————       |
| D8-2         | ————       | ————       | ————       | ————        | ————       | ————       |

**Figure S34.** Predicted translation products of both alleles in the *Dec1* deletion cell.

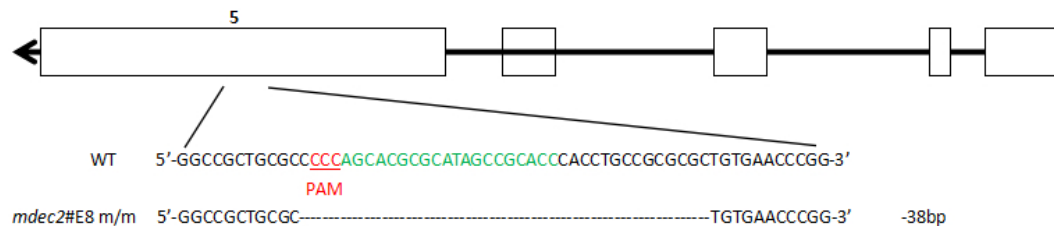

**Figure S35.** The sgRNA targeting the *Dec2* gene and the sequences of both alleles in the *Dec2* deletion cell strain.

|              |                                                                    |
|--------------|--------------------------------------------------------------------|
| <i>mdec2</i> | MDEGIPHLQE RQLEHRDFI GLDYSSLYMC KPKRSLKRDD TKDTYKLPHR LIEKKRRDRI   |
| E8-1/2       | MDEGIPHLQE RQLEHRDFI GLDYSSLYMC KPKRSLKRDD TKDTYKLPHR LIEKKRRDRI   |
|              | *****                                                              |
| <i>mdec2</i> | NECIAQLKDL LPEHLKL TTL GHLEKAVVLE LTLKHLKALT ALTEQQHQKI IALQNGERSL |
| E8-1/2       | NECIAQLKDL LPEHLKL TTL GHLEKAVVLE LTLKHLKALT ALTEQQHQKI IALQNGERSL |
|              | *****                                                              |
| <i>mdec2</i> | KSPVQADLDA FHSGFQTCAK EVLQYLARFE SWTPREPRCA QLVSHLHAVA TQLLTPQVPS  |
| E8-1/2       | KSPVQADLDA FHSGFQTCAK EVLQYLARFE SWTPREPRCA QLVSHLHAVA TQLLTPQVPS  |
|              | *****                                                              |
| <i>mdec2</i> | GRGSGRAPCS AGAAAAAGPE RVARCVPIQ RTQPGTEPEH DTD TDSGYGG EAEQGAAVK   |
| E8-1/2       | GRGSGRAPCS AGAAAAAGPE RVARCVPIQ RTQPGTEPEH DTD TDSGYGG EAEQGAAVK   |
|              | *****                                                              |
| <i>mdec2</i> | QEPPGDSSPA PKRPKLEARG ALLGPEPALL GSLVALGGA PFAQPAAPF CLPFYLLSPS    |
| E8-1/2       | QEPPGDSSPA PKRPKLEARG ALLGPEPALL GSLVALGGA PFAQPAAPF CLPFYLLSPS    |
|              | *****                                                              |
| <i>mdec2</i> | AAAYVQPWLD KSGLDKYL YP AAAAFPLL Y PGIPAAAAA AAAAFCLSS VLSPPPEKAG   |
| E8-1/2       | AAAYVQPWLD KSGLDKYL YP AAAAFPLL Y PGIPAAAAA AAAAFCLSS VLSPPPEKAG   |
|              | *****                                                              |
| <i>mdec2</i> | ATAGAPFLAH EVAPPGLRP QHAHSRTHLP RAVNPESSE DATQPAKDAP *             |
| E8-1/2       | ATAGAPFLAH EVAPPGLRC <b>EPGELSGRCH AAGQGRPL</b> — — — — —          |
|              | *****                                                              |

**Figure S36.** Predicted translation products of both alleles in the *Dec2* deletion cell.

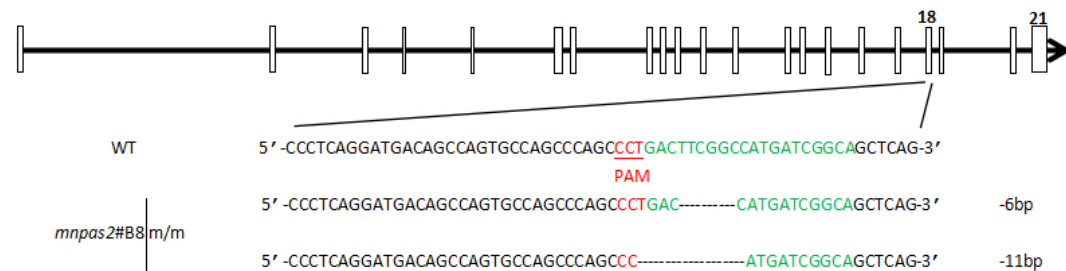

**Figure S37.** The sgRNA targeting the *Npas2* gene and the sequences of both alleles in the *Npas2* deletion cell strain.



|              |             |                       |                       |                       |                       |                      |
|--------------|-------------|-----------------------|-----------------------|-----------------------|-----------------------|----------------------|
| <i>npas2</i> | MDDEKDR     | RASRNKSEKK            | RRDQFNVL              | ELSSMLPGNT            | RKMDKTTVLE            | KVIGFLQKHN           |
| B8-1         | MDDEKDR     | RASRNKSEKK            | RRDQFNVL              | ELSSMLPGNT            | RKMDKTTVLE            | KVIGFLQKHN           |
| B8-2         | MDDEKDR     | RASRNKSEKK            | RRDQFNVL              | ELSSMLPGNT            | RKMDKTTVLE            | KVIGFLQKHN           |
|              | *****       | *****                 | *****                 | *****                 | *****                 | *****                |
| <i>npas2</i> | EVSAQTEICD  | IQQDWKPSFL            | SNEEFTQLML            | EALDGFVIVV            | TTDGSIIYVS            | DSITPLLGH            |
| B8-1         | EVSAQTEICD  | IQQDWKPSFL            | SNEEFTQLML            | EALDGFVIVV            | TTDGSIIYVS            | DSITPLLGH            |
| B8-2         | EVSAQTEICD  | IQQDWKPSFL            | SNEEFTQLML            | EALDGFVIVV            | TTDGSIIYVS            | DSITPLLGH            |
|              | *****       | *****                 | *****                 | *****                 | *****                 | *****                |
| <i>npas2</i> | PADVMDQNL   | NFLPEQEHSE            | VYKILSSHML            | VTDSPSPEFL            | KSDNDLEFYC            | HLLRGS LNPK          |
| B8-1         | PADVMDQNL   | NFLPEQEHSE            | VYKILSSHML            | VTDSPSPEFL            | KSDNDLEFYC            | HLLRGS LNPK          |
| B8-2         | PADVMDQNL   | NFLPEQEHSE            | VYKILSSHML            | VTDSPSPEFL            | KSDNDLEFYC            | HLLRGS LNPK          |
|              | *****       | *****                 | *****                 | *****                 | *****                 | *****                |
| <i>npas2</i> | EFPTYEYIKF  | VGNFRSYNNV            | PSPSCNGFDN            | TLSRPCHVPL            | GKDVCFIATV            | RLATPQFLKE           |
| B8-1         | EFPTYEYIKF  | VGNFRSYNNV            | PSPSCNGFDN            | TLSRPCHVPL            | GKDVCFIATV            | RLATPQFLKE           |
| B8-2         | EFPTYEYIKF  | VGNFRSYNNV            | PSPSCNGFDN            | TLSRPCHVPL            | GKDVCFIATV            | RLATPQFLKE           |
|              | *****       | *****                 | *****                 | *****                 | *****                 | *****                |
| <i>npas2</i> | MCVADEPLEE  | FTSRHSLEWK            | FLFLDHRAPP            | IIGYLPFEVL            | GTSGYDYYHI            | DDLELLARCH           |
| B8-1         | MCVADEPLEE  | FTSRHSLEWK            | FLFLDHRAPP            | IIGYLPFEVL            | GTSGYDYYHI            | DDLELLARCH           |
| B8-2         | MCVADEPLEE  | FTSRHSLEWK            | FLFLDHRAPP            | IIGYLPFEVL            | GTSGYDYYHI            | DDLELLARCH           |
|              | *****       | *****                 | *****                 | *****                 | *****                 | *****                |
| <i>npas2</i> | QHLMQFGK GK | SCCYRFLTKG            | QQWIWLQTHY            | YITYHQWNSK            | PEFIVCTHSV            | VSYADV RVER          |
| B8-1         | QHLMQFGK GK | SCCYRFLTKG            | QQWIWLQTHY            | YITYHQWNSK            | PEFIVCTHSV            | VSYADV RVER          |
| B8-2         | QHLMQFGK GK | SCCYRFLTKG            | QQWIWLQTHY            | YITYHQWNSK            | PEFIVCTHSV            | VSYADV RVER          |
|              | *****       | *****                 | *****                 | *****                 | *****                 | *****                |
| <i>npas2</i> | RQELALEDP   | TEAMHPSAVK            | EKDSSLEPPQ            | PFNALDMGAS            | GLPSSPSPA             | SSRSSHKSSH           |
| B8-1         | RQELALEDP   | TEAMHPSAVK            | EKDSSLEPPQ            | PFNALDMGAS            | GLPSSPSPA             | SSRSSHKSSH           |
| B8-2         | RQELALEDP   | TEAMHPSAVK            | EKDSSLEPPQ            | PFNALDMGAS            | GLPSSPSPA             | SSRSSHKSSH           |
|              | *****       | *****                 | *****                 | *****                 | *****                 | *****                |
| <i>npas2</i> | TAMSEPTSTP  | TKLMAENSTT            | ALPRPATLPQ            | ELPVQGLSQA            | ATMPTALHSS            | ASCDLTQQL            |
| B8-1         | TAMSEPTSTP  | TKLMAENSTT            | ALPRPATLPQ            | ELPVQGLSQA            | ATMPTALHSS            | ASCDLTQQL            |
| B8-2         | TAMSEPTSTP  | TKLMAENSTT            | ALPRPATLPQ            | ELPVQGLSQA            | ATMPTALHSS            | ASCDLTQQL            |
|              | *****       | *****                 | *****                 | *****                 | *****                 | *****                |
| <i>npas2</i> | LQSLPQTGLQ  | SPPAPVTQFS            | AQFSMFQTIK            | DQLEQRTRIL            | QANIRWQQEE            | LHKIQEQ LCL          |
| B8-1         | LQSLPQTGLQ  | SPPAPVTQFS            | AQFSMFQTIK            | DQLEQRTRIL            | QANIRWQQEE            | LHKIQEQ LCL          |
| B8-2         | LQSLPQTGLQ  | SPPAPVTQFS            | AQFSMFQTIK            | DQLEQRTRIL            | QANIRWQQEE            | LHKIQEQ LCL          |
|              | *****       | *****                 | *****                 | *****                 | *****                 | *****                |
| <i>npas2</i> | VQDSNVQMFL  | QQPAVSLSFS            | STQRPAQQQ             | LQQRPAAPSQ            | PQLVVNTPLQ            | GQITSTQVTN           |
| B8-1         | VQDSNVQMFL  | QQPAVSLSFS            | STQRPAQQQ             | LQQRPAAPSQ            | PQLVVNTPLQ            | GQITSTQVTN           |
| B8-2         | VQDSNVQMFL  | QQPAVSLSFS            | STQRPAQQQ             | LQQRPAAPSQ            | PQLVVNTPLQ            | GQITSTQVTN           |
|              | *****       | *****                 | *****                 | *****                 | *****                 | *****                |
| <i>npas2</i> | QHLLRESNVI  | SAQGPKPMRS            | SQLLPASGRS            | LSSLPSQFSS            | TASVLPPLGLS           | LTTIAPTQPD           |
| B8-1         | QHLLRESNVI  | SAQGPKPMRS            | SQLLPASGRS            | LSSLPSQFSS            | TASVLPPLGLS           | LTTIAPTQPD           |
| B8-2         | QHLLRESNVI  | SAQGPKPMRS            | SQLLPASGRS            | LSSLPSQFSS            | TASVLPPLGLS           | LTTIAPTQPD           |
|              | *****       | *****                 | *****                 | *****                 | *****                 | *****                |
| <i>npas2</i> | DSQCQPSPDF  | GHDRQLRLLL            | SQPIQPMMPG            | SCDARQPSEV            | SRTGRQVKYA            | QSQVMFSPD            |
| B8-1         | DSQCQPSPD   | <del>GHDRQLRLLL</del> | <del>SQPIQPMMPG</del> | <del>SCDARQPSEV</del> | <del>SRTGRQVKYA</del> | <del>QSQVMFSPD</del> |
| B8-2         | DSQCQPS*    | <del>GHDRQLRLLL</del> | <del>SQPIQPMMPG</del> | <del>SCDARQPSEV</del> | <del>SRTGRQVKYA</del> | <del>QSQVMFSPD</del> |
|              | *****       |                       |                       |                       |                       |                      |
| <i>npas2</i> | SHPTNSSAST  | PVLLMGQAVL            | HPSFASRPS             | PLQPAQAQQQ            | PPPYLQAPTS            | LHSEQPD SLL          |
| B8-1         | SHPTNSSAST  | PVLLMGQAVL            | HPSFASRPS             | PLQPAQAQQQ            | PPPYLQAPTS            | LHSEQPD SLL          |
| B8-2         |             |                       |                       |                       |                       |                      |
| <i>npas2</i> | LSTFSQQPGT  | LCYAATQSTP            | PQPPRPSRRV            | SRLSES*               |                       |                      |
| B8-1         | LSTFSQQPGT  | LCYAATQSTP            | PQPPRPSRRV            | SRLSES*               |                       |                      |
| B8-2         |             |                       |                       |                       |                       |                      |

**Figure S38.** Predicted translation products of both alleles in the *Npas2* deletion cell.



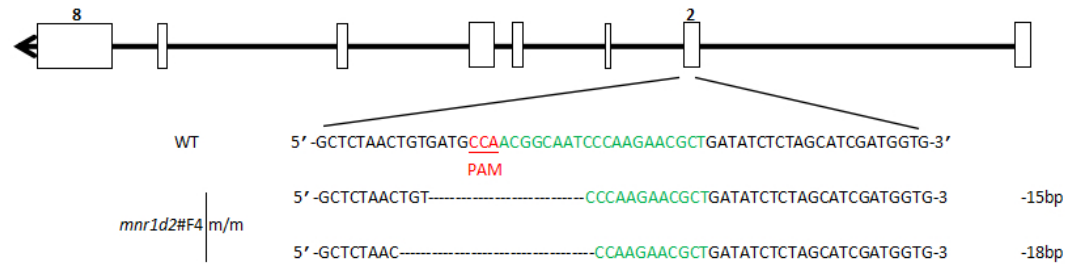

**Figure S39.** The sgRNA targeting the *Nr1d2* gene and the sequences of both alleles in the *Nr1d2* deletion cell strain.

|               |            |             |             |             |            |             |
|---------------|------------|-------------|-------------|-------------|------------|-------------|
| <i>mnr1d2</i> | MELNAGGVIA | YISSSSSASS  | PASCHSEGSE  | NSFQSSSSSV  | PSSPNSSNCD | ANGNPKNADI  |
| F4-1          | MELNAGGVIA | YISSSSSASS  | PASCHSEGSE  | NSFQSSSSSV  | PSSPNSSNC- | ----PKNADI  |
| F4-2          | MELNAGGVIA | YISSSSSASS  | PASCHSEGSE  | NSFQSSSSSV  | PSSPNSSNPR | TLISLASMVF  |
|               | *****      | *****       | *****       | *****       | *****      | *****       |
| <i>mnr1d2</i> | SSIDGVLKSD | RTDCPVKTGK  | TSAPGMTKSH  | SGMTKFSGMV  | LLCKVCGDVA | SGPHYGVHAC  |
| F4-1          | SSIDGVLKSD | RTDCPVKTGK  | TSAPGMTKSH  | SGMTKFSGMV  | LLCKVCGDVA | SGPHYGVHAC  |
| F4-2          | *          | -----       | -----       | -----       | -----      | -----       |
| <i>mnr1d2</i> | EGCKGFFRRS | IQQNIQYKKC  | LKNENC SIMR | MNRNRCQQCR  | FKKCLSVGMS | RDAVRFG RIP |
| F4-1          | EGCKGFFRRS | IQQNIQYKKC  | LKNENC SIMR | MNRNRCQQCR  | FKKCLSVGMS | RDAVRFG RIP |
| F4-2          | -----      | -----       | -----       | -----       | -----      | -----       |
| <i>mnr1d2</i> | KREKQRLIE  | MQSAMKTMMN  | TQFSCHLQND  | TLAEQHDQSA  | LPAQEQLRPK | SQLEQENIKN  |
| F4-1          | KREKQRLIE  | MQSAMKTMMN  | TQFSCHLQND  | TLAEQHDQSA  | LPAQEQLRPK | SQLEQENIKN  |
| F4-2          | -----      | -----       | -----       | -----       | -----      | -----       |
| <i>mnr1d2</i> | TPSDFAKEEV | IGMVTRAHKD  | TFLYNQEHRE  | NSSESMPFQR  | GERIPRNMEQ | YNLNQDHRGS  |
| F4-1          | TPSDFAKEEV | IGMVTRAHKD  | TFLYNQEHRE  | NSSESMPFQR  | GERIPRNMEQ | YNLNQDHRGS  |
| F4-2          | -----      | -----       | -----       | -----       | -----      | -----       |
| <i>mnr1d2</i> | GIHNHFPCSE | RQQHLSGQYK  | GRNIMHYPNG  | HAVCIANGHC  | MNFSSAYTQR | VCDRIPVGGC  |
| F4-1          | GIHNHFPCSE | RQQHLSGQYK  | GRNIMHYPNG  | HAVCIANGHC  | MNFSSAYTQR | VCDRIPVGGC  |
| F4-2          | -----      | -----       | -----       | -----       | -----      | -----       |
| <i>mnr1d2</i> | SQTENRNSYL | CNTGGRMHLV  | CPMSKSPYVD  | PQKSGHEIWE  | EFMSMFTPAV | KEVVEFAKRI  |
| F4-1          | SQTENRNSYL | CNTGGRMHLV  | CPMSKSPYVD  | PQKSGHEIWE  | EFMSMFTPAV | KEVVEFAKRI  |
| F4-2          | -----      | -----       | -----       | -----       | -----      | -----       |
| <i>mnr1d2</i> | PGFRDLSQHD | QVNLLKAGTF  | EVL MVRFASL | FDAKERTVTF  | LSGKKYSVDD | LHSMGAGDLL  |
| F4-1          | PGFRDLSQHD | QVNLLKAGTF  | EVL MVRFASL | FDAKERTVTF  | LSGKKYSVDD | LHSMGAGDLL  |
| F4-2          | -----      | -----       | -----       | -----       | -----      | -----       |
| <i>mnr1d2</i> | SSMFEFSEKL | NALQLSDEEM  | SLFTAVVLVS  | ADRS GIENVN | SVEALQETLI | RALRTLIMKN  |
| F4-1          | SSMFEFSEKL | NALQLSDEEM  | SLFTAVVLVS  | ADRS GIENVN | SVEALQETLI | RALRTLIMKN  |
| F4-2          | -----      | -----       | -----       | -----       | -----      | -----       |
| <i>mnr1d2</i> | HPNEASIFTK | LLLKL PDLRS | LNNMHSEELL  | AFKVHP*     |            |             |
| F4-1          | HPNEASIFTK | LLLKL PDLRS | LNNMHSEELL  | AFKVHP*     |            |             |
| F4-2          | -----      | -----       | -----       | -----       |            |             |

**Figure S40.** Predicted translation products of both alleles in the *Nr1d2* deletion cell.

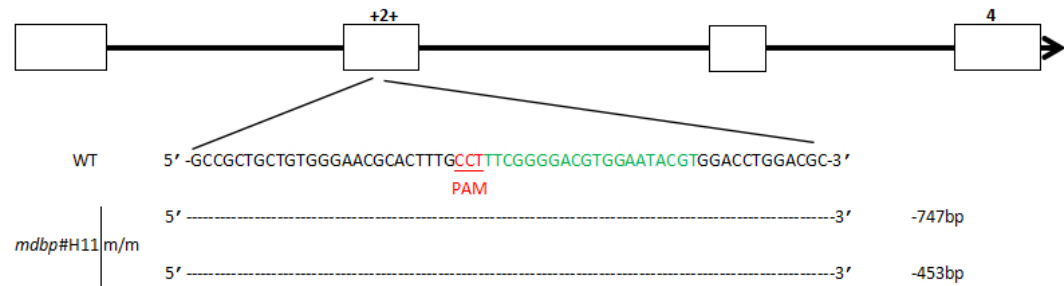

**Figure S41.** The sgRNA targeting the *Dbp* gene and the sequences of both alleles in the *Dbp* deletion cell strain.

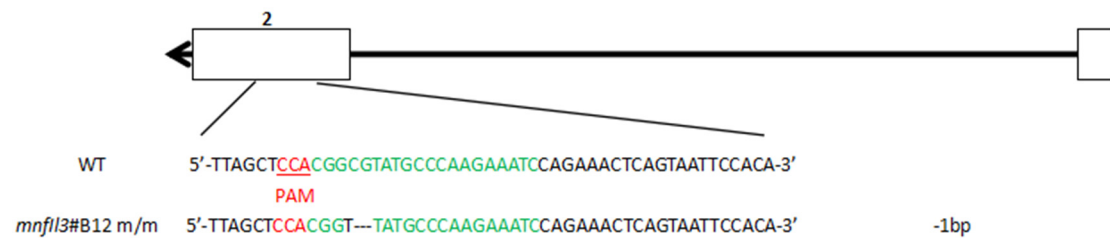

**Figure S42.** The sgRNA targeting the *Nfil3* gene and the sequences of both alleles in the *Nfil3* deletion cell strain.

|               |            |            |            |            |            |            |
|---------------|------------|------------|------------|------------|------------|------------|
| <i>mnfil3</i> | MQLRKMQTIK | KEPAPLDPTS | SSDKMLLLNS | ALAEVAEDLA | SGEDLLLNEG | SMGKNKSSAC |
| B12-1/2       | MQLRKMQTIK | KEPAPLDPTS | SSDKMLLLNS | ALAEVAEDLA | SGEDLLLNEG | SMGKNKSSAC |
|               | *****      | *****      | *****      | *****      | *****      | *****      |
| <i>mnfil3</i> | RRKREFIPDE | KKDAMYWEKR | RKNNEAAKRS | REKRRLNDLV | LENKLIALGE | ENATLKAELL |
| B12-1/2       | RRKREFIPDE | KKDAMYWEKR | RKNNEAAKRS | REKRRLNDLV | LENKLIALGE | ENATLKAELL |
|               | *****      | *****      | *****      | *****      | *****      | *****      |
| <i>mnfil3</i> | SLKLKFGNIS | STAYAQEIQK | LSNSTAVYFQ | DYQTSKAAVS | SFVDEHEPAM | VAGSCISVIK |
| B12-1/2       | SLKLKFGNIS | STVMPKKSRL | SVIPQLSTFR | TTRHPLRP*- | -----      | -----      |
|               | *****      | **         |            |            |            |            |
| <i>mnfil3</i> | HSPQSSLSDV | SEVSSVEHTQ | ESPAQGGCRS | PENKFPVIKQ | EPVELESFAR | EAREERGTYG |
| B12-1/2       | -----      | -----      | -----      | -----      | -----      | -----      |
| <i>mnfil3</i> | TSIQSYMGSS | SFSTYSHSPP | LLQVHGSTSN | SPRTSEADEG | VVGKSSDGED | BQQVPGKPIH |
| B12-1/2       | -----      | -----      | -----      | -----      | -----      | -----      |
| <i>mnfil3</i> | SPVELQRVHA | TVVKVPEVNP | SALPHKLRIK | AKAMQVKVEA | LDSEFEGMQK | LSSPADAIK  |
| B12-1/2       | -----      | -----      | -----      | -----      | -----      | -----      |
| <i>mnfil3</i> | RHFDLEKHGT | SGMAHSSLPP | FSVQVTNIQD | WSLKSEHWHH | KELSSKTQSS | FKTGVVEVKD |
| B12-1/2       | -----      | -----      | -----      | -----      | -----      | -----      |
| <i>mnfil3</i> | GGYKVSEAEN | LYLKQGIANL | SAEVVSLKRF | IATQPISASD | SR*        |            |
| B12-1/2       | -----      | -----      | -----      | -----      | -----      |            |

**Figure S43.** Predicted translation products of both alleles in the *Nfil3* deletion cell.

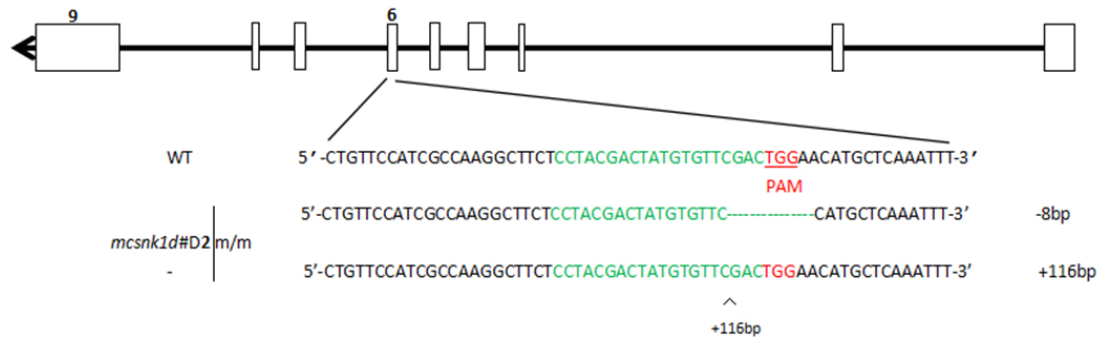

**Figure S44.** The sgRNA targeting the *Csnk1d* gene and the sequences of both alleles in the *Csnk1d* deletion cell strain (Knocking-out of CK1d was reported in Guo et al., JBR, 2019).

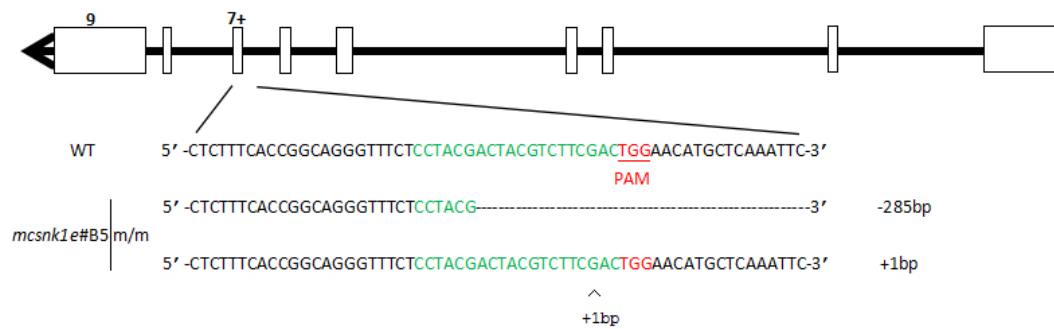

**Figure S45.** The sgRNA targeting the *Csnk1e* gene and the sequences of both alleles in the *Csnk1e* deletion cell strain (Knocking-out of CK1e was reported in Guo et al., JBR, 2019).

**Note:** No translation predictions on *Dbp*-H11, *Per2*-A2, and *Rorb*-B3 cell lines, due to the impairments of splicing signals in the targeted exons by mutated nucleotides.

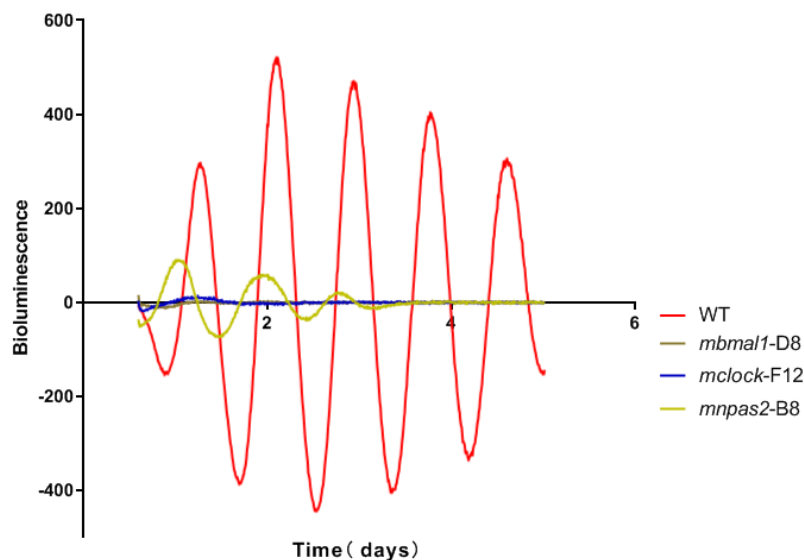

**Figure S46.** The bioluminescence of the wild-type, Bmal1-D8, Clock-F12, and Npas2-B8 cells. These genes belong to the core positive regulator group.

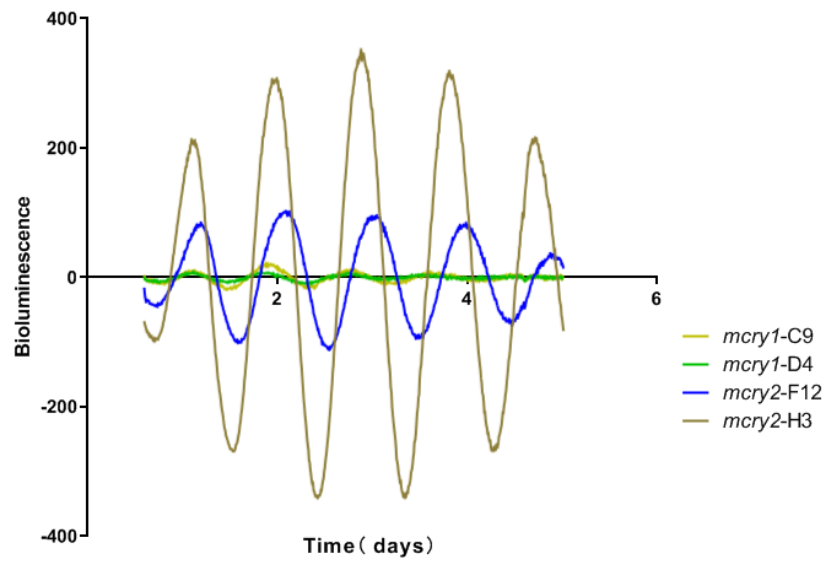

**Figure S47.** The bioluminescence of the Cry1 and Cry2 knock-out cells.

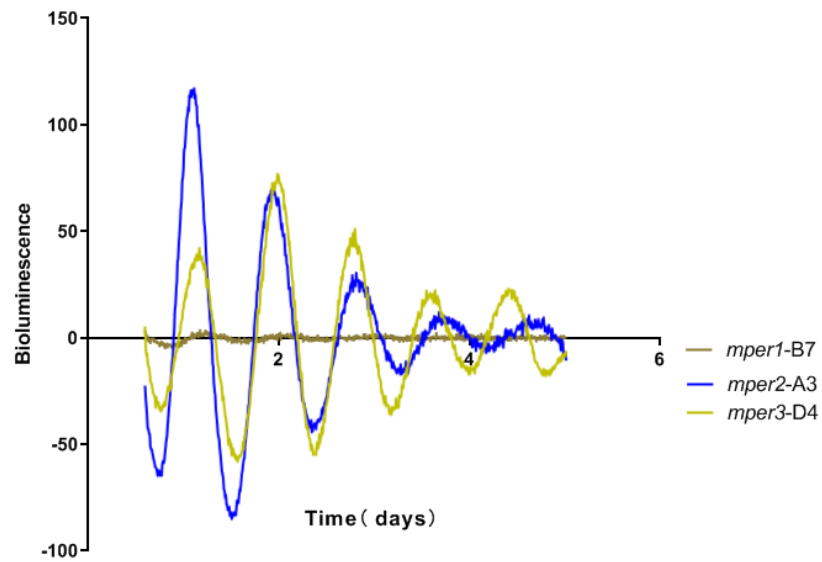

**Figure S48.** The bioluminescence of the Per1, Per2, and Per3 knock-out cells.

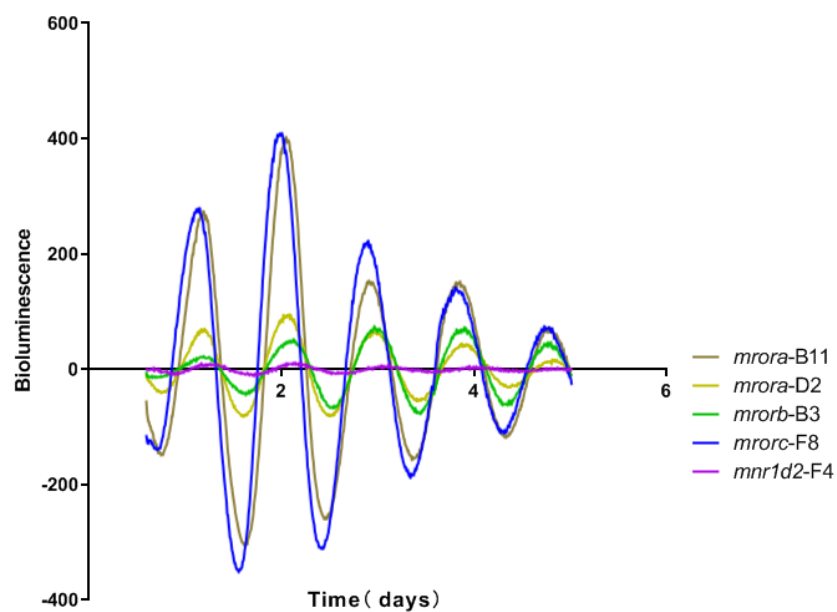

**Figure S49.** The bioluminescence of the *Rora*-B11, *Rora*-D2, *Rorb*-B3, *Rorc*-F8, *Nr1d2*-F4 cells. These genes represent regulators for the *Bmal1* gene.

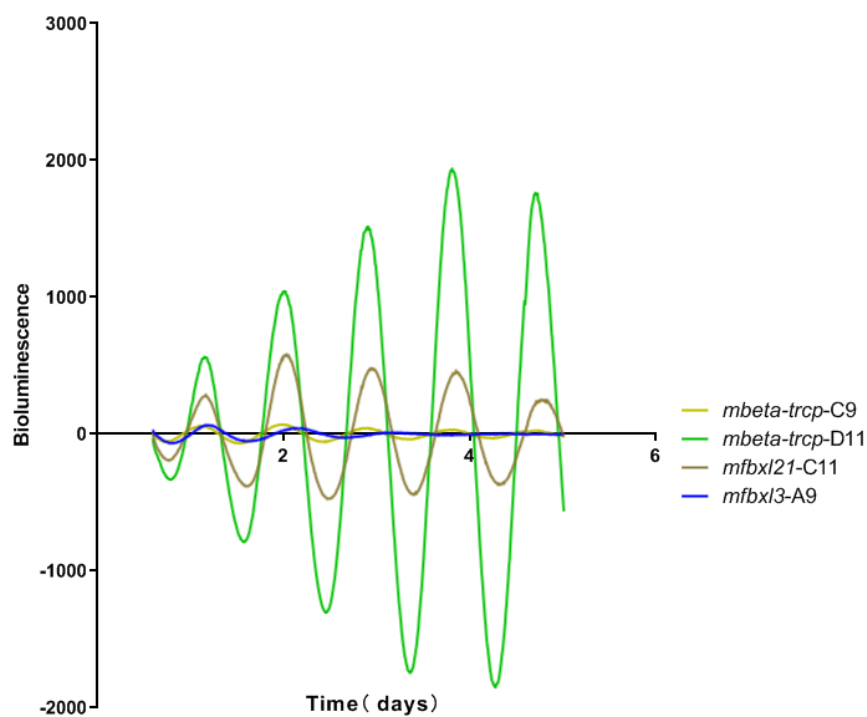

**Figure S50.** The bioluminescence of the *Beta-trcp*-C9, *Beta-trcp*-D11, *Fbxl21*-C11, *Fbxl3*-A9 cells. These genes represent E3 ligases.

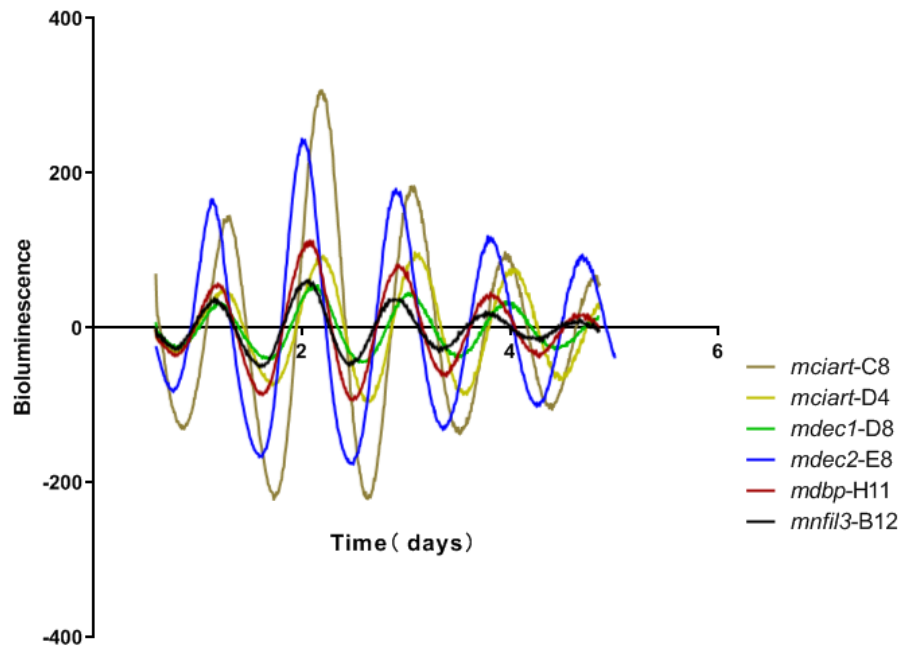

**Figure S51.** The bioluminescence of the Ciart-C8, Ciart-D4, Dec1-D8, Dec2-E8, Dbp-H11, Nfil3-B12 cells. These represent auxiliary regulators.

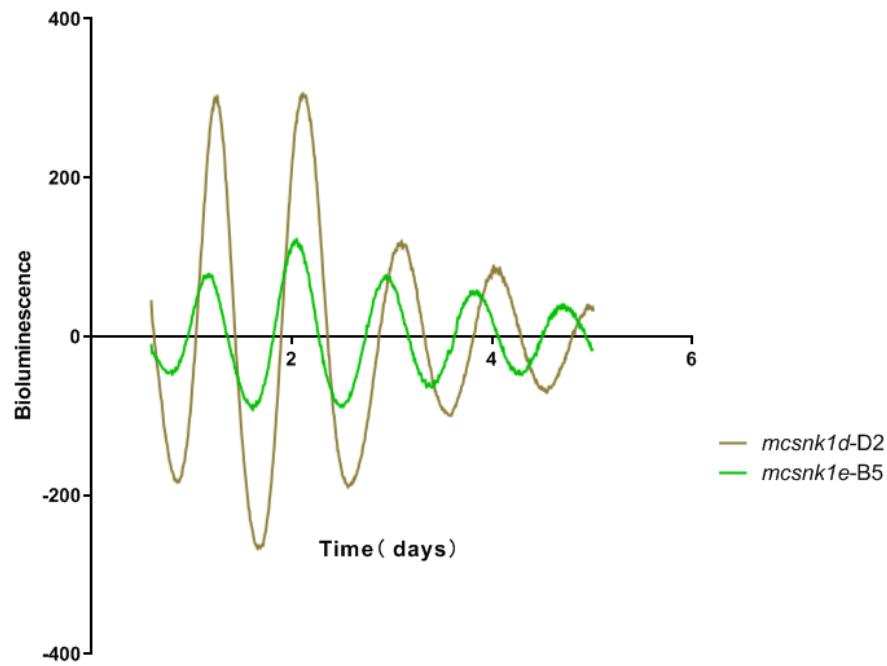

**Figure S52.** The bioluminescence of the casein kinase genes, Csnk1d-D2, Csnk1e-B5 cells.

**Table S1. The sequence information of sgRNAs used in this study.**

| <b>Target gene</b> | <b>sequence</b>          | <b>Loction-Exon</b> | <b>Score</b> |
|--------------------|--------------------------|---------------------|--------------|
| <i>Bmal1</i>       | ACCCGTATTTCCCCGTTGCTGG   | 14/21               | 98           |
| <i>Clock</i>       | TCCATCTTTCTCGCGTTACCAAGG | 6/23                | 94           |
| <i>Npas2</i>       | TGCCGATCATGGCCGAAGTCAGG  | 18/21               | 95           |
| <i>Cry1</i>        | TTCGCCGGCTCTTCCAACGTGGG  | 1/13                | 95           |
| <i>Cry2</i>        | ACGGTCCCCGCGCAATCGATGGG  | 1/12                | 99           |
| <i>Per1</i>        | TCGCTTCTGTGCTCGGAACGGGG  | 11/23               | 93           |
| <i>Per2</i>        | TCGATTCCGCACCCGCAACGGGG  | 11/23               | 99           |
| <i>Per3</i>        | GCCGCACTGAGCGTGGCGTCTGG  | 15/21               | 96           |
| <i>Rora</i>        | ACGCGATTTTCGTCTTCGGTCAGG | 9/11                | 98           |
| <i>Rorb</i>        | ACCGGCGGCACATACGCCAACGG  | 4/10                | 97           |
| <i>Rorc</i>        | GTTGCGGCTGGTTCGGTCAATGG  | 3/10                | 97           |
| <i>Nr1d1</i>       | GTTGCGATTGATGCGAACGATGG  | 4/8                 | 99           |
| <i>Nr1d2</i>       | AGCGTTCTTGGGATTGCCGTGG   | 2/8                 | 91           |
| <i>Dbp</i>         | ACGTATTCCACGTCCCCGAAAGG  | 2/4                 | 95           |
| <i>Nfil3</i>       | GATTCTTGGGCATACGCCGTGG   | 2/2                 | 98           |
| <i>Ciart</i>       | CAGCCCCGGGGTCACCGTGGTGG  | 5/5                 | 79           |
| <i>Dec1</i>        | CATGGACGCAGGTTGCGCGTGGG  | 5/5                 | 92           |
| <i>Dec2</i>        | GGTGCGGCTATGCGCGTGCTGGG  | 5/5                 | 97           |
| <i>Beta-trcp</i>   | TGGTACCGCGTGACGTCGGACGG  | 6/15                | 98           |
| <i>Fbxl21</i>      | GCCCCGGGCTCGATCTATTAAAGG | 4/7                 | 97           |
| <i>Fbxl3</i>       | TCGGACTTATCTCGACTGCCCGG  | 3/5                 | 95           |
| <i>Myc</i>         | GCTGTACGGAGTCGTAGTCGAGG  | 2/3                 | 98           |
| <i>Timeless</i>    | TACTCGAGCCCGTGAACGTTTGG  | 23/29               | 98           |
| <i>Csnk1d</i>      | CCTACGACTATGTGTTGACTGG   | 6/9                 | 95           |
| <i>Csnk1e</i>      | CCTACGACTACGTCTTCGACTGG  | 7/9                 | 98           |

**Note:** Location-Exon means the number of sgRNA's exon /total exon

**Table S2. The sequence information of primers to amplify targeted sites**

| <b>GeneName</b>    | <b>Forward primer<br/>(5'to 3')</b> | <b>Reverse primer<br/>(5'to 3')</b> | <b>Product<br/>length</b> |
|--------------------|-------------------------------------|-------------------------------------|---------------------------|
| <i>Bmal1-C</i>     | AGGTGAGACCGAATCCCACT                | TAGAAAAGCCAGCTGACCACC               | 664bp                     |
| <i>Clock-C</i>     | CTGTCTCCCCAGGCTTACG                 | TGACATATTTGAGCCAGGCGTG              | 569bp                     |
| <i>Npas2-C</i>     | TGCCATCCCAGTTTAGCAGT                | GGGTAGTGTACTCAAGCCGAG               | 552bp                     |
| <i>Cry1-C</i>      | CTCCACACTATGAGTTACCTAG<br>ACAC      | GAGCTCGTGTCCGTTTCGTGGAG             | 983bp                     |
| <i>Cry2-C</i>      | CCCACAGCACACCCCTAAAA                | GAGGCGATCCAGACTCCTTG                | 594bp                     |
| <i>Per1-C</i>      | GATCTTCACCAACCCGACACA               | CCAGCGTGGAGACACAGTT                 | 585bp                     |
| <i>Per2-C</i>      | ATCTCTATCCCACAGACCCCC               | GTTGGACCCACTGGGAATGC                | 613bp                     |
| <i>Per3-C</i>      | GGCCTTAGCTGTCCGTGTAA                | TCACCTGGTGCAGCCAATAA                | 518bp                     |
| <i>Rora-C</i>      | CAGCTGACAGTGGTGGCTAA                | CCGCTGAGCCATCTTTTCAC                | 614bp                     |
| <i>Rorb-C</i>      | AGGGCAAGGGGCTAGTGATA                | GAGCATGGTGCCTAGAGAGAG               | 1050bp                    |
| <i>Rorc-C</i>      | ATCTGGGATCCACTACGGGG                | CCCCCACATTCTCACCATCTC               | 593bp                     |
| <i>Nr1d1-C</i>     | GGGGCGAGAAGGAGATATGG                | AGCTCCTATCCAGTCCAGTCC               | 512bp                     |
| <i>Nr1d2-C</i>     | ATGCCAGGAGCACTGGTTTT                | CTGGTGTGAGCCAGGAATGT                | 547bp                     |
| <i>Beta-trcp-C</i> | TCAGGCATGTGCTGCTCTTT                | TGTCTCTCAGGCTTTCTGCAA               | 562bp                     |
| <i>Fbxl3-C</i>     | CGACCGGATCAGAAAGCTCA                | TGGACACCCTTGCTTCACTC                | 1084bp                    |
| <i>Fbxl21-C</i>    | GCACCAATCAATGCGTGGA                 | AACAGCCCAGTGAGAAACTG                | 726bp                     |
| <i>Ciart-C</i>     | GGACAGGCGGACATAGGATG                | ACACACCTGTTGCACAAACG                | 555bp                     |
| <i>Dbp-C</i>       | GGCCCCTAACCCTATCCTTC                | CTGCTCGCTCCCATTTTTTG                | 991bp                     |
| <i>Nfil3-C</i>     | ATGGAGGTGGAATACGTGCC                | TTGTACCAGTACCCGCTGAC                | 981bp                     |
| <i>Dec1-C</i>      | CTCGTCACTCATCTCCATCGTG              | GATCTGCTTCAAAGCCTGGAGC              | 696bp                     |
| <i>Dec2-C</i>      | CGTACAGCCCTGGCTAGACAAG              | CTGTTCCAGGCTTGGGTCGAG               | 715bp                     |
| <i>Csnk1d-C</i>    | ATCCAGAAGGAGCTGACTCTGA<br>GC        | TGAGCTGTACCTCTACTTAGATGC<br>TG      | 800bp                     |
| <i>Csnk1e-C</i>    | CTCAGAAAGGGCCACCACTT                | TCATCCCGCCCCCTCTTAGAT               | 651bp                     |
| <i>Myc-C</i>       | GTATTCCCTACAGTCGCCTCC               | CGACCGCAACATAGGATGGA                | 585bp                     |
| <i>Timeless-C</i>  | AGGTAAAGGCATGGGCTCTG                | CTACAGTGCTTTGTGGGGTGA               | 527bp                     |



**Table S3. The most possible off-target sites for each individual gene in this study**

| <b>Target gene</b> | <b>sequence</b>          | <b>Chromosome</b> | <b>Site</b> | <b>Score</b> |
|--------------------|--------------------------|-------------------|-------------|--------------|
| <i>Bmal1</i>       | ACCCTTATTTTCCCGTTCCCAAG  | 17                | -91174644   | 0.6          |
| <i>Clock</i>       | TCCTTCCTTCTCCCGTTACCAAG  | 13                | 42768150    | 0.7          |
| <i>Npas2</i>       | TGCTGATCATCGCCAAAGTCTAG  | 15                | -8659777    | 0.4          |
| <i>Cry1</i>        | TCCACCGGTCCTTCCAACGTCAG  | 10                | -41714430   | 0.8          |
| <i>Cry2</i>        | CCTGTCCCCGTGCAATCGACTAG  | 11                | 111524673   | 0.4          |
| <i>Per1</i>        | TGCGTACTGTGCTCGGAACGCGG  | 11                | 51817733    | 0.8          |
| <i>Per2</i>        | TCCCTTCCGCAGCCGCGACGGAG  | 6                 | -100094135  | 0.3          |
| <i>Per3</i>        | GCAACACTGAGCGAGGCGTCGGG  | 13                | 12487247    | 0.4          |
| <i>Rora</i>        | AAGTGATTTCTTCTTCAGTCAAG  | 8                 | -112844682  | 0.3          |
| <i>Rorb</i>        | ACCGGCGGCCAGACGCCAGCAG   | 6                 | -71781796   | 0.4          |
| <i>Rorc</i>        | GTGGAGGGTGGTTTCGGTCACAGG | 8                 | 118850237   | 0.7          |
| <i>Nr1d2</i>       | AGGCTTCCTGTGATTGCCGTCAG  | 7                 | -119338549  | 0.8          |
| <i>Dbp</i>         | TCTTATTCCACCTCCCCGAATAG  | 9                 | -66088878   | 1.4          |
| <i>Nfil3</i>       | GATTCCTTGAGTATACGCCAGGG  | 4                 | 86171320    | 0.3          |
| <i>Ciart</i>       | CTGTCCCGGGGTCACCATGGCAG  | 2                 | -131948868  | 1.3          |
| <i>Dec1</i>        | CCGGGAGGCAGGGTCGCCGTGAG  | 10                | -61461408   | 0.4          |
| <i>Dec2</i>        | GGAGCAGACATGCGCGTGCTGGG  | 11                | 68844738    | 0.5          |
| <i>Beta-trcp</i>   | CGGGACAGCGTGACGTCGCAAGG  | 4                 | -151671218  | 0.4          |
| <i>Fbxl21</i>      | CCCAGGGCCCTATCTATTAAAGG  | 2                 | -14610824   | 0.5          |
| <i>Fbxl3</i>       | TGGGACTTGTCTCGACTGCATAG  | 6                 | 58683716    | 0.9          |
| <i>Csnk1d</i>      | GGTTGGGGAAGCCTTGCGGACAG  | 7                 | 51888871    | 1.7          |
| <i>Csnk1e</i>      | CCTACGACTATGTGTTTCGACTGG | 11                | -120832891  | 0.5          |

**Table S4. Primers to amplify the most possible off-target site for individual genes**

| <b>GeneName</b>     | <b>Forward primer<br/>(5'to 3')</b> | <b>Reverse primer<br/>(5'to 3')</b> | <b>Product<br/>length</b> |
|---------------------|-------------------------------------|-------------------------------------|---------------------------|
| <i>Bmal1</i> -O     | ACGATGAGGAGGTTAGTGA                 | TGTAAGTGGAAATGGGTA                  | 618bp                     |
| <i>Clock</i> -O     | AGTGCGGTTCTGCTATT                   | TTTCTGTCAACGCTTCA                   | 488bp                     |
| <i>Npas2</i> -O     | CATTAGAAGGTAGGAGCAT                 | CAAGATTGAACGGGTGT                   | 601bp                     |
| <i>Cry1</i> -O      | GTCATCCTCCTGCCACT                   | GTCCCATCAACTAATCCTT                 | 494bp                     |
| <i>Cry2</i> -O      | GTGTTACAGGCTTCCC                    | CTCAGCAGGTGTTTCC                    | 199bp                     |
| <i>Per1</i> -O      | CCCCATAAGTGTTCCGTAGA                | CCTCAGCCCATCCTGTAGTC                | 499bp                     |
| <i>Per2</i> -O      | CTTTGCTCACTCCCTCTGG                 | TCTGGCGATTGTCTTCC                   | 395bp                     |
| <i>Per3</i> -O      | CTGCGTTCAGCGAGTG                    | TCTAAGTTCGCGCTATTCA                 | 545bp                     |
| <i>Rora</i> -O      | GAGAACGGAAGGTGAG                    | CAGCATCCTGGAGACA                    | 548bp                     |
| <i>Rorb</i> -O      | ACTGCCAACGGACAACG                   | CTCGGCTACGGAAACAAA                  | 445bp                     |
| <i>Rorc</i> -O      | GTTCTTGACGCTCAC                     | GCCTCCTGGATGTTG                     | 223bp                     |
| <i>Nr1d1</i> -O     | GGTCAAGGGAAATAAAG                   | GGGTCTTAACGCAGT                     | 555bp                     |
| <i>Nr1d2</i> -O     | AAGGGTCCTGCTCCA                     | GATTCTTAGGCATTACAG                  | 529bp                     |
| <i>Beta-trcp</i> -O | GGGCTCTAAACTTGGGACGAA               | GCGGTTGAGGGCTGGATT                  | 162bp                     |
| <i>Fbxl3</i> -O     | AAACCCGAAGTCAGTAG                   | GATGGCAATCCAAGTAG                   | 416bp                     |
| <i>Fbxl21</i> -O    | TTTATCTCCTGCTTCTACT                 | CTTCTGCCTCAACCC                     | 936bp                     |
| <i>Ciart</i> -O     | GCAAGGGTTCAAGGC                     | AGGCAAATGGTGGTTAG                   | 500bp                     |
| <i>Dbp</i> -O       | TGGCAGCAGCACCTAA                    | CACCACCATCTCAGACACC                 | 776bp                     |
| <i>Nfil3</i> -O     | AAACAAGTGGGTAAAGTGC                 | GTTGCCCGATACAGATT                   | 503bp                     |
| <i>Dec1</i> -O      | CACCATTGTTCCCTT                     | CTGCTCCTCAGTGTTAG                   | 550bp                     |
| <i>Dec2</i> -O      | TCATCTTTCTTGGCTCTTC                 | TCCCGTGCTGACTTCTT                   | 255bp                     |
| <i>Csnk1d</i> -O    | GCACTTGTTAGGGACTTGG                 | CTGCGGTGATAGGAGGT                   | 469bp                     |
| <i>Csnk1e</i> -O    | TTGGCTTTTCACAACTCTA                 | TTTCTGCCGTTCTCTTA                   | 269bp                     |
| <i>Myc</i> -O       | TTGCTGAACGGACAAATAC                 | CGGGACCAATGGAGACA                   | 1039bp                    |
| <i>Timeless</i> -O  | TCCCTGCTATTGCTGC                    | ATGGGTTTGGTCTTTCC                   | 308bp                     |
